# Supplementary material for: Evaluating the transcriptional regulators of arterial gene expression via a catalogue of characterized arterial enhancers
Source: eLife journal article supplement (doi:10.7554/elife.102440), 2025-01-17

**Figure 3 - figure supplement 1****A**

Schematic of the primary ocular vasculature

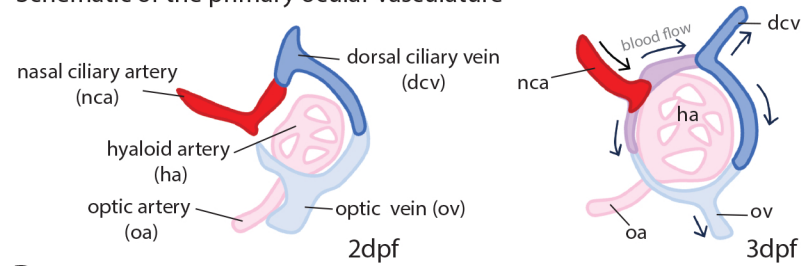**B**F1 *tg(Cxcr4-194:GFP; kdrl:HRAS-mCherry)*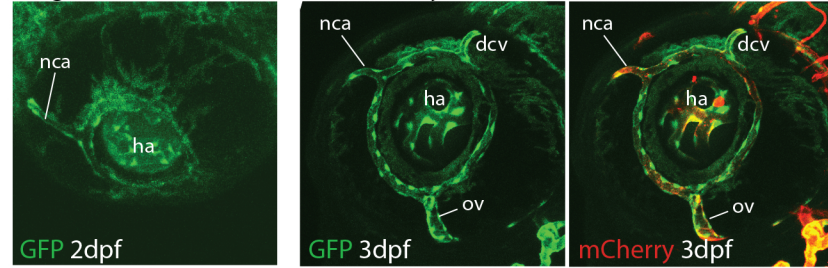F2 *tg(Cxcr4+135:GFP; kdrl:HRAS-mCherry)*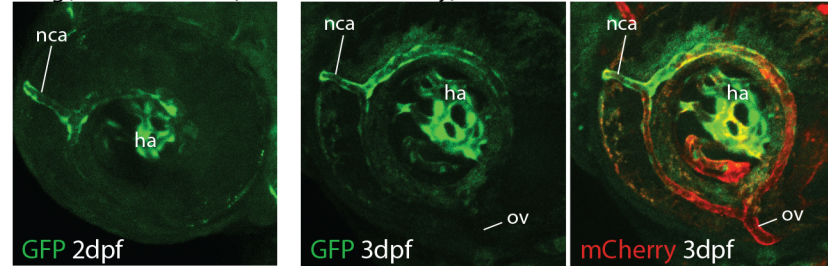F2 *tg(Cxcr4+151:GFP; kdrl:HRAS-mCherry)*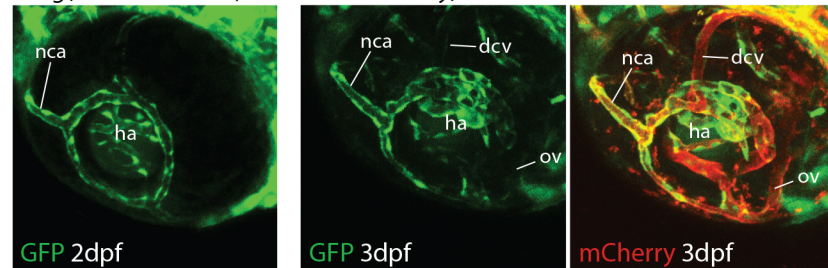F2 *tg(Efnb2-333; kdrl:HRAS-mCherry)*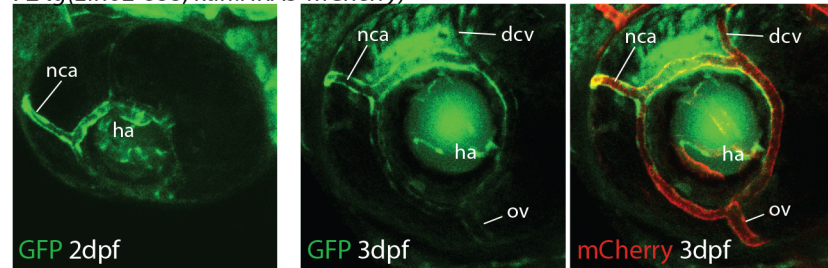F1 *tg(Efnb2-159:GFP; kdrl:HRAS-mCherry)*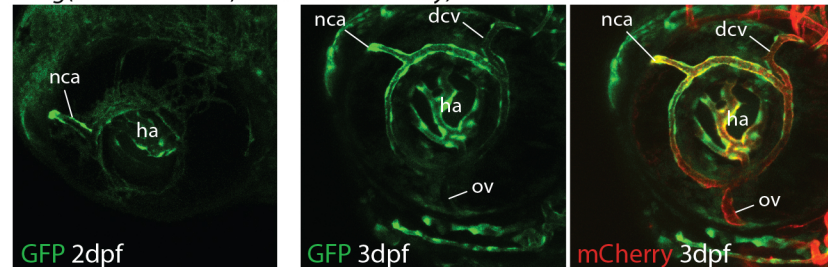F2 *tg(Efnb2-141:GFP; kdrl:HRAS-mCherry)*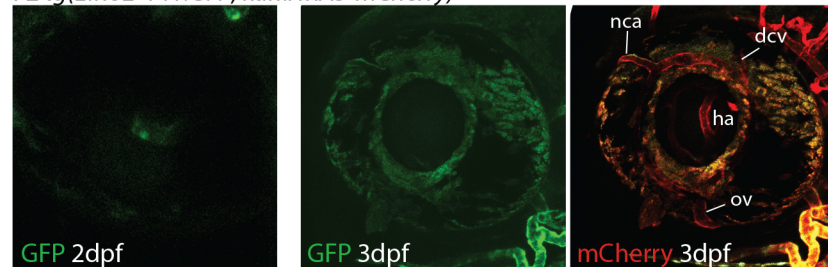F1 *tg(Efnb2-112:GFP; kdrl:HRAS-mCherry)*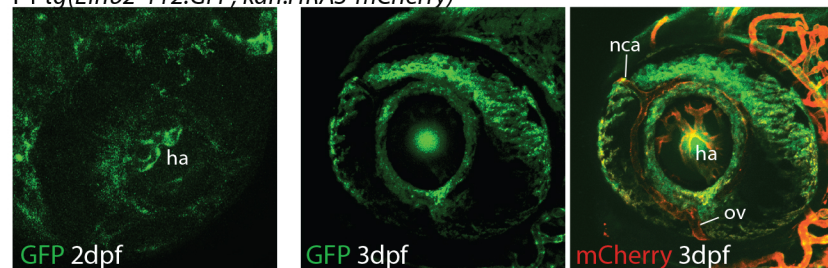**B continued**F2 *tg(Gja4-50; kdrl:HRAS-mCherry)*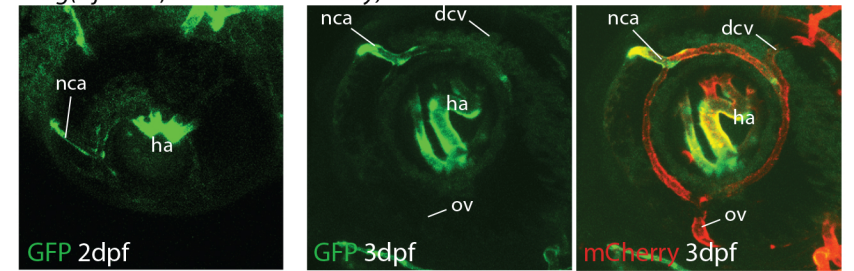F2 *tg(Unc5b+30; kdrl:HRAS-mCherry)*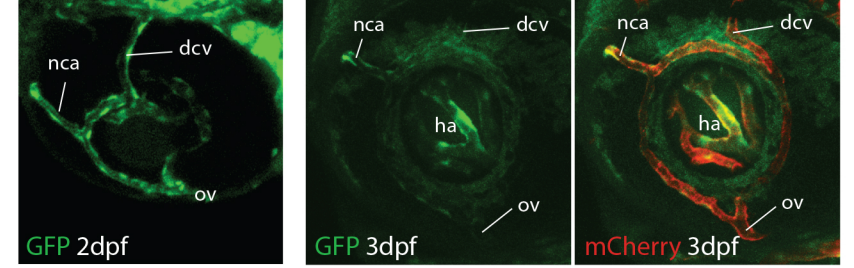F2 *tg(Unc5b+39; kdrl:HRAS-mCherry)*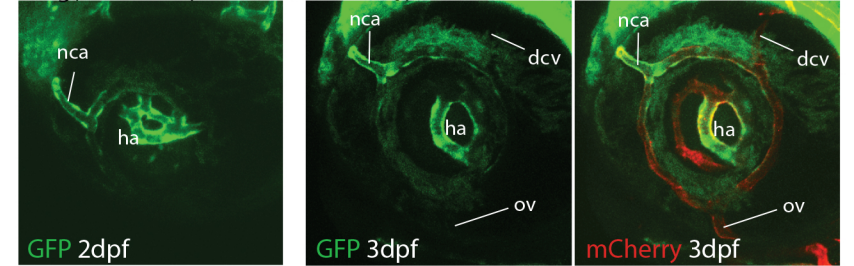F2 *tg(Acvrl1+6:GFP; kdrl:HRAS-mCherry)*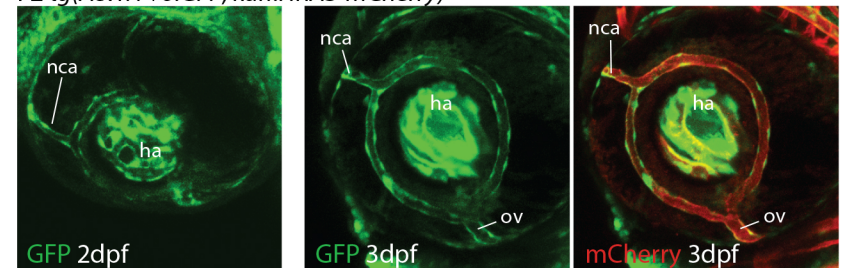F1 *tg(Cxcl12+269:GFP; kdrl:HRAS-mCherry)*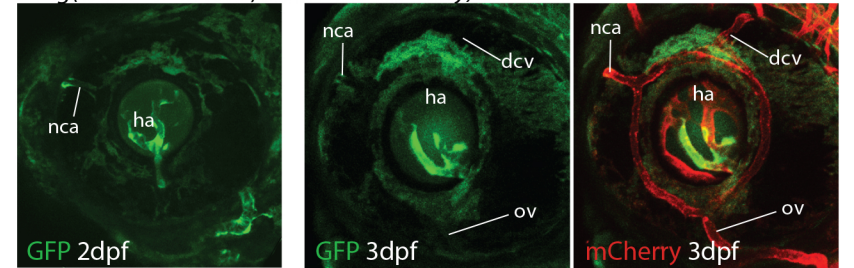F2 *tg(Gja5-78; kdrl:HRAS-mCherry)*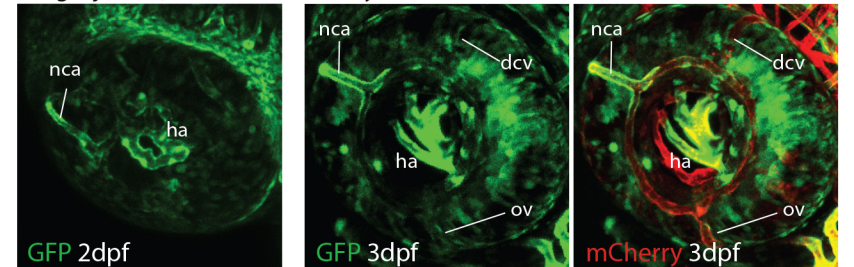F2 *tg(Gja5-7; kdrl:HRAS-mCherry)*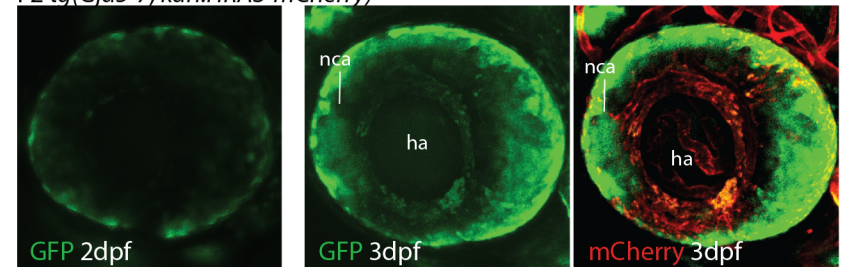F1 *tg(Nrp1+78; kdrl:HRAS-mCherry)*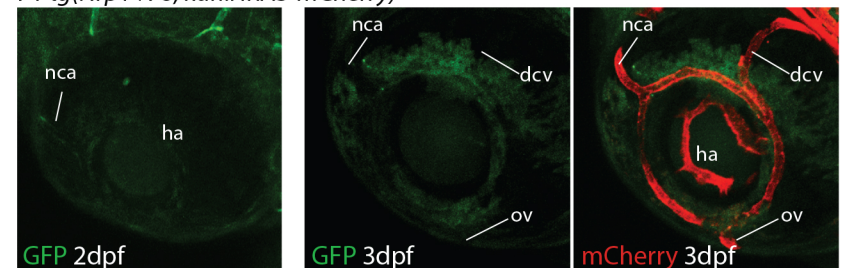

Supplement: supp [file elife-102440-supp-v1.zip]
