# Supplementary material for: Evaluating the transcriptional regulators of arterial gene expression via a catalogue of characterized arterial enhancers
Source: eLife. 2025 Jan 17;14:e102440. doi: 10.7554/eLife.102440 (PMC11896612; doi:10.7554/eLife.102440)
Supplement: Figure 4—source data 1. — DA dorsal aorta, ISA intersegmental arteries, DLAV dorsal longitudinal anastomotic vessel, CV cardinal vein, ISV intersegmental veins, NT neural tube, NCA nasal ciliary artery, NCAx extends beyond NCA in direction of blood flow, HA hyaloid artery, DCV dorsal ciliary vein, OV optic vein. A fin artery, V fin vein. Letters s m w equate to strong medium or weak relative expression, * restricted to distal regions, ** restricted to anterior regions, *** restricted to subset of ECs. [file elife-102440-fig4-data1.xlsx]

## Sheet: Sheet1
ENHANCER	2dpf trunk vessels					3dpf trunk vessels						3dpf ocular vessels					adult fin vessels
	DA	ISA	DLAV	CV	NT	DA	ISA	DLAV	CV	ISV	NT	NCA	NCA x	HA	DCV	OV	A	A sprout	V
Cxcr4-194	s	s	s		w	s	s	s	m**	m**	m	s	s	s	s	s	s	s	s***
Cxcr4+135		s	s				s	s				s	w	s			s	s
Cxcr4+151	m	s	s	w*	w	w	s	s				s	s	m			s	s	s***
Efnb2-333	s	s	m		s	s	s	w			s	s	s	m			s	s
Efnb2-159		s	s				s	s				s	s	s			not tested	not tested	not tested
Efnb2-141	s					s											s
Efnb2-112	m	m	m	w		m	m	m		w	w						not tested	not tested	not tested
Gja4+50	s	s	s			s	s	s				s		s			s	s
Unc5b+30	s	m	m	w*		s	w					s		s
Unc5b+39		s	s		s		s	s		w	w	s		s				s
Acvrl1+6	s	w		w*	m	s			w*		m	m	m	s	m	m
Cxcl12+269		s					s				w	w		s			m	s
Gja5-78	s	m			w	s	s	s	w*	w		s		s			s	w
Gja5-7	s	w		w*		s					w						m	w
Nrp1+78		s	s	w*	w		s	s			w						w	w
