# Supplementary material for: Evaluating the transcriptional regulators of arterial gene expression via a catalogue of characterized arterial enhancers
Source: eLife. 2025 Jan 17;14:e102440. doi: 10.7554/eLife.102440 (PMC11896612; doi:10.7554/eLife.102440)
Supplement: Figure 9—source data 1. — M indicates enhancer contains one of more strongly conserved motifs for designated transcription factor, while m indicates weakly conserved motifs. C indicates a binding peak (as assessed by ChIP-seq or similar) for designated transcription factor in an enhancer with a corresponding motif, while c indicates a binding peak without a corresponding motif. [file elife-102440-fig9-data1.xlsx]

## Sheet: Sheet1
ENHANCER	In vivo	ETS	SOXF	FOXO	FOX:ETS	RBPJ	MEF2	SMAD			TCF/LEF	NR2F2	KLF4
	class							SMAD4 M	SMAD1/5 M	ChIP-seq
Cxcr4-194	Arterial*	M		M								m
Cxcr4+135	Arterial	M + C	M + C 7,17	M + C	ADJACENT	m + C	M + C	M				M + C	c
Cxcr4+151	Arterial	M	M + C 7,17	M + C	m	M					m
Efnb2-333	Arterial	M + C	M + C 7,17,18	M + C	M	M + C	M + C	m	m	C 1/5, 2		m
Efnb2-159	Arterial	M + C	M + C 7,17	M + C		M	M + C	M		C 1/5		M + C	m
Efnb2-141	Arterial	M + C	M + C 7,17	M + C	OVERLAP	M		m
Efnb2-112	Arterial	M	M + C 7,17,18	M + C		M		m	m
Gja4+50	Arterial	M + C	M + C 7,17	M	M	M + C		M	m	C 1/5		c	M
Unc5b+30	Arterial	M + C	M + C 7,17	M	OVERLAP	M	M					m
Unc5b+39	Arterial	M	M + C 7,17	M		M + C	M + C	M					m
Acvrl1+6	Arterial	M + C	M + C 7,17,18	M	M	m		M	m			c	m
Cxcl12+269	Arterial	M	M	M		M	c	m
Gja5-78	Arterial	M + C	M + C 17, 18	M + C	M	m						c
Gja5-7	Arterial	M + C	M + C 7,17,18	M + C	OVERLAP			m		C 1/5		M + C
Nrp1+78	Arterial	M + C	M + C 7,17,18	M + C	ADJACENT	M	M + C	M		C 1/5
DLL4-12*	Arterial	M + C	M + C 7,17	M + C		M		M	m				m
DLL4in3*	Arterial	M + C	M + C 17, 18	M	M	M + C	M + C	M			M	M + C
ECE1in1*	Arterial	M + C	M + C 7,17,18	F:E ONLY	M			M		C 1/5		c	M
Flk1in10*	Arterial	M + C	m	M + C	M	M	m + C	m	m		M		m
Hey1-18*	Arterial	M + C	M + C 7,17,18	F:E ONLY	M	M + C		m	M	C 1/5, 2		c	m
NOTCH1+16*	Arterial	M + C	M + C 7,17	M		m		m	m			c	m
Sema6d-55*	Arterial	M + C	M + C 7,17,18	M + C			M	M			M
SOX7+14*	Arterial	M + C	M + C 7,17,18	c				M	M	C 1/5, 2		c
Apln+28*	Pan-EC	M + C	m + C 7,17,18					M				c	m
Cdh5-1*	Pan-EC	M + C	M + C 7,17	F:E ONLY	M	M		M	M				M
Egfl7-2*	Pan-EC	M + C	M + C 7,17,18	F:E ONLY	M			m	m	C 1/5, 2		c	m
Egfl7-9*	Pan-EC	M + C	M + C 7,17,18	c				m		C 1/5, 2
Eng-8*	Pan-EC	M + C	c 7	F:E ONLY	M	M		m	M			c	m
Fli1+12*	Pan-EC	M + C	M + C 7,17,18	m		m		M
Flk1+3*	Pan-EC	M + C	M + C 7,17,18	F:E ONLY	M	m						M + C	M
Gata2+9*	Pan-EC	M + C	M + C 7,17,18	M	OVERLAP		m + C	M	m		M	c
Mef2cF7*	Pan-EC	M + C	M + C 7,17,18	c		M		m				c	m
Notch1+33*	Pan-EC	M + C	c 7, 17, 18	F:E ONLY	M					c		M + C
Pdgfrb+18*	Pan-EC	F:E ONLY		F:E ONLY	M	m		m			M
Tal1-4*	Pan-EC	M + C	M + C17	M			c	M	M	C 1/5, 2		M	M
Tie1-1*	Pan-EC	M + C	M + C 7,17,18	M	ADJACENT	M		M		C 2		c	M
CoupTFII-965*	Venous	M + C	M + C 7,17,18	M + C	OVERLAP	m + C	M	M	m	C 1/5, 2			M
Ephb4-2*	Venous	M + C	c 7, 17, 18			M		M	M	C 1/5, 2		M + C	M
Mef2C F10*	Venous	M + C		M	M		m	M	M			M + C
