# Supplementary material for: Evaluating the transcriptional regulators of arterial gene expression via a catalogue of characterized arterial enhancers
Source: eLife. 2025 Jan 17;14:e102440. doi: 10.7554/eLife.102440 (PMC11896612; doi:10.7554/eLife.102440)
Supplement: Figure 9—source data 2. — C indicates a binding peak (as assessed by ChIP-seq or similar) in an enhancer with a corresponding motif, while c indicates a binding peak without a corresponding motif. DA dorsal aorta, ISA intersegmental arteries, DLAV dorsal longitudinal anastomotic vessel, CV cardinal vein, ISV intersegmental veins, NT neural tube, NCA nasal ciliary artery, NCAx extends beyond NCA in direction of blood flow, HA hyaloid artery, DCV dorsal ciliary vein, OV optic vein. A fin artery, V fin vein. Letters s m w equate to strong medium or weak relative expression, * restricted to distal regions, ** restricted to anterior regions, *** restricted to subset of ECs. [file elife-102440-fig9-data2.xlsx]

## Sheet: Sheet1
TF motif patterns												3 dpf trunk vessels
ETS	SOXF	FOXO	FOX:	RBPJ	MEF2	SMAD			TCF	NR2F2	KLF4	DA	ISA	DLAV	CV	ISV	NT
			ETS			4	15	ChIP
M		M								m		s	s	s	m**	m**	m	Cxcr4-194
M + C	M + C 17, 18	M	M	M + C	M + C	M			M	M + C		s	s	s	n	w	n	DLL4in3*
M + C	M + C 7,17	M	M	M + C		M	m	15		c	M	s	s	s	n	n	n	Gja4+50
M + C	M + C 17, 18	M + C	M	m						c		s	s	s	w*	w	n	Gja5-78
M	M + C 7,17,18	M + C		M		m	m					m	m	m	n	w	w	Efnb2-112
M + C	M + C 7,17,18	M + C	M	M + C	M + C	m	m	15 2		m		s	s	w	n	n	s	Efnb2-333
M + C	M + C 7,17	M	OLAP	M	M					m		s	w	n	n	n	n	Unc5b+30
M + C	M + C 7,17	M + C		M		M	m				m	s	w	n	w*	n	s	DLL4-12*
M + C	M + C 7,17,18	M + C	OLAP			m		15 2		M + C		s	n	n	n	n	w	Gja5-7
M + C	M + C 7,17	M + C	OLAP	M		m						s	n	n	n	n	n	Efnb2-141
M + C	M + C 7,17,18	M	M	m		M	m			c	m	s	n	n	w*	n	m	Acvrl1+6
M	M + C 7,17	M + C	m	M					m			w	s	s	n	n	n	Cxcr4+151
M	M	M		M	c	m						n	s	n	n	n	w	Cxcl12+269
M + C	M + C 7,17	M + C	ADJ	m + C	M + C	M				M + C	c	n	s	s	n	n	n	Cxcr4+135
M + C	M + C 7,17	M + C		M	M + C	M		15 2		M + C	m	n	s	s	n	n	n	Efnb2-159
M	M + C 7,17	M		M + C	M + C	M					m	n	s	s	n	w	w	Unc5b+39
M + C	M + C 7,17,18	M + C	ADJ	M	M + C	M		15 2				n	s	s	n	n	w	Nrp1+78
