# Supplementary material for: Evaluating the transcriptional regulators of arterial gene expression via a catalogue of characterized arterial enhancers
Source: eLife journal article supplement (doi:10.7554/elife.102440), 2025-01-17
Supplement: supp [file elife-102440-supp-v1.zip]

ETS SOXF FOX FOX:ETS RBPJ MEF2 SMAD4 SMAD1/5 TCF/LEF NR2F2 KLF

Conserved to cow

Conserved to chicken

Conserved to chicken

Conserved to chicken

Conserved to opossum

Conserved to tenrec

Conserved to opossum

Conserved to opossum

Conserved to tenrec

Conserved to opossum

>ACCAA**CTTCTCT**CAAGTCCCTGGGATCCAAGATT**CAAAACAATA**GCTGTGTCGGTGGCGGCGGGTTGCCCTTGATGCAGAGTTTCGGT**GGGTGGCTAAT**  
**TTTAG**CTGAGGACTACAGCTT**TTCCCA**GGCAGCGTCACTGGCCACTGTCT**CAGCCT**TGGCCCTGG**CAAAAA**AG**GCTCT**GCT**TTTCTCT**CCCAG**CTGGGAGC**  
 TGAGGACTGC**CTGGCG**CTCAGGACAATTCC**CTTTGT**GCCTG**CTTCCGGGTGGCTCT**TAAAGCTCAGA
