# Supplementary material for: Evaluating the transcriptional regulators of arterial gene expression via a catalogue of characterized arterial enhancers
Source: eLife journal article supplement (doi:10.7554/elife.102440), 2025-01-17
Supplement: supp [file elife-102440-supp-v1.zip]

Figure 6 – figure supplement 1

A

| Rank | Motif | Name                                                            | P-value | log P-value | Rank | Motif | Name                                                   | P-value | log P-value |
|------|-------|-----------------------------------------------------------------|---------|-------------|------|-------|--------------------------------------------------------|---------|-------------|
| 1    |       | ETV1(ETS)/GIST48-ETV1-ChIP-Seq(GSE22441)/Homer                  | 1e-9    | -2.270e+01  | 19   |       | Foxo1(Forkhead)/RAW-Foxo1-ChIP-Seq(Fan_et_al)/Homer    | 1e-6    | -1.490e+01  |
| 2    |       | E1f4(ETS)/BMDM-E1f4-ChIP-Seq(GSE86999)/Homer                    | 1e-9    | -2.240e+01  | 20   |       | SPDEF(ETS)/VCaP-SPDEF-ChIP-Seq(SRA014231)/Homer        | 1e-5    | -1.375e+01  |
| 3    |       | EHF(ETS)/LoVo-EHF-ChIP-Seq(GSE49402)/Homer                      | 1e-9    | -2.177e+01  | 21   |       | ELFI(ETS)/Jurkat-ELFI-ChIP-Seq(SRA014231)/Homer        | 1e-5    | -1.368e+01  |
| 4    |       | ERG(ETS)/VCaP-ERG-ChIP-Seq(GSE14097)/Homer                      | 1e-8    | -2.009e+01  | 22   |       | ETS1(ETS)/Jurkat-ETS1-ChIP-Seq(GSE17954)/Homer         | 1e-5    | -1.328e+01  |
| 5    |       | Ets1(distal)(ETS)/CD4+PolII-ChIP-Seq(Barski_et_al)/Homer        | 1e-8    | -1.969e+01  | 23   |       | Sox7(HMG)/ESC-Sox7-ChIP-Seq(GSE133899)/Homer           | 1e-5    | -1.317e+01  |
| 6    |       | Sox15(HMG)/CPA-Sox15-ChIP-Seq(GSE62909)/Homer                   | 1e-8    | -1.941e+01  | 24   |       | Elk4(ETS)/Helo-Elk4-ChIP-Seq(GSE31477)/Homer           | 1e-5    | -1.296e+01  |
| 7    |       | Sox2(HMG)/mES-Sox2-ChIP-Seq(GSE11431)/Homer                     | 1e-8    | -1.921e+01  | 25   |       | Sox10(HMG)/SciaticNerve-Sox3-ChIP-Seq(GSE35132)/Homer  | 1e-4    | -1.089e+01  |
| 8    |       | Sox3(HMG)/NPC-Sox3-ChIP-Seq(GSE33059)/Homer                     | 1e-8    | -1.866e+01  | 26   |       | ELF5(ETS)/T47D-ELF5-ChIP-Seq(GSE30407)/Homer           | 1e-4    | -1.087e+01  |
| 9    |       | Sox6(HMG)/Myotubes-Sox6-ChIP-Seq(GSE32627)/Homer                | 1e-7    | -1.839e+01  | 27   |       | ETS(ETS)/Promoter/Homer                                | 1e-4    | -1.069e+01  |
| 10   |       | ETV4(ETS)/HepG2-ETV4-ChIP-Seq(ENCODE)/Homer                     | 1e-7    | -1.823e+01  | 28   |       | FOXK1(Forkhead)/HEK293-FOXK1-ChIP-Seq(GSE51673)/Homer  | 1e-3    | -9.105e+00  |
| 11   |       | EWS-ERG-fusion(ETS)/SK-N-MC-EWS-ChIP-Seq(SRA014231)/Homer       | 1e-7    | -1.820e+01  | 29   |       | Elk1(ETS)/Helo-Elk1-ChIP-Seq(GSE31477)/Homer           | 1e-3    | -8.935e+00  |
| 12   |       | EWS-FLI1-fusion(ETS)/SK-N-MC-EWS-FLI1-ChIP-Seq(SRA014231)/Homer | 1e-7    | -1.800e+01  | 30   |       | Foxo3(Forkhead)/U2OS-Foxo3-ChIP-Seq(E-MTAB-2701)/Homer | 1e-3    | -8.187e+00  |
| 13   |       | Sox17(HMG)/Endoderm-Sox17-ChIP-Seq(GSE61475)/Homer              | 1e-7    | -1.780e+01  | 31   |       | Rbpj1(7)/Panc1-Rbpj1-ChIP-Seq(GSE47459)/Homer          | 1e-3    | -7.239e+00  |
| 14   |       | Eiv2(ETS)/ES-ER71-ChIP-Seq(GSE9402)/Homer                       | 1e-7    | -1.650e+01  | 32   |       | PU.1(ETS)/ThioMac-PU.1-ChIP-Seq(GSE21512)/Homer        | 1e-2    | -6.769e+00  |
| 15   |       | GABPA(ETS)/Jurkat-GABPA-ChIP-Seq(GSE17954)/Homer                | 1e-7    | -1.643e+01  | 33   |       | MeZa(MADS)/HL1-MeZa.biotin-ChIP-Seq(GSE21529)/Homer    | 1e-2    | -6.084e+00  |
| 16   |       | Fli1(ETS)/CD8-FLI1-ChIP-Seq(GSE0898)/Homer                      | 1e-7    | -1.625e+01  | 34   |       | FoxL2(Forkhead)/Ovary-FoxL2-ChIP-Seq(GSE60858)/Homer   | 1e-2    | -6.025e+00  |
| 17   |       | Sox21(HMG)/ESC-SOX21-ChIP-Seq(GSE110505)/Homer                  | 1e-6    | -1.564e+01  | 35   |       | Foxf1(Forkhead)/Lung-Foxf1-ChIP-Seq(GSE177951)/Homer   | 1e-2    | -5.745e+00  |
| 18   |       | ELF3(ETS)/PDAC-ELF3-ChIP-Seq(GSE4557)/Homer                     | 1e-6    | -1.511e+01  | 36   |       | FOXP1(Forkhead)/H9-FOXP1-ChIP-Seq(GSE31006)/Homer      | 1e-2    | -5.499e+00  |

B

| TF      | Sequence logo | Type                                      | TF      | Sequence logo | Type                                              |
|---------|---------------|-------------------------------------------|---------|---------------|---------------------------------------------------|
| ERG     |               | ChIP-seq HUVEC <sup>1</sup>               | RBPJ    |               | ChIP-seq <sup>2</sup>                             |
| ETS1    |               | ChIP-seq HUVEC <sup>3</sup>               | MEF2A   |               | ChIP-seq JASPAR/ReMap2018 <sup>4,5</sup>          |
| SOX7    |               | ChIP-seq <sup>4</sup>                     | MEF2C   |               | ChIP-seq JASPAR/ENCODE <sup>5</sup>               |
| SOX17   |               | ChIP-seq JASPAR/ReMap2022 <sup>2,7</sup>  | SMAD4   |               | ChIP-seq, JASPAR2016/PAZAR <sup>8,9</sup>         |
| FOXO1   |               | HT-SELEX JASPAR <sup>5,10</sup>           | SMAD1/5 |               | ChIP-seq, HUVEC <sup>11</sup> Morikawa et al 2011 |
| FOXO2   |               | HT-SELEX JASPAR <sup>5,10</sup>           | LEF1    |               | HT-SELEX, <sup>10</sup>                           |
| FOXO1   |               | ChIP-seq JASPAR/PAZAR <sup>5,9</sup>      | TCF7L2  |               | ChIP-seq JASPAR/ENCODE <sup>5</sup>               |
| FOX:ETS |               | Enhancer analysis <sup>12</sup>           | NR2F2   |               | ChIP-seq, HUVEC <sup>13</sup>                     |
| RBPJ    |               | ChIP-seq, JASPAR/ReMap2018 <sup>4,5</sup> | KLF4    |               | ChIP-seq, <sup>4,5</sup>                          |
| RBPJ    |               | ChIP-seq, <sup>14</sup>                   |         |               |                                                   |

C

**ETS motif search:** CGGAAA, CGGAAG, AGGAAA, AGGAAG, TGGAAA, TGGAAG, TTTCGG, CTTCGG, TTTCCT, CTTCCCT, TTCCCA, CTTCCA. **SOX motif search:** ACAATG, CATTGT, AGAATG, CATCT, ACAAAG, CTTGT, AGAAAG, CTTCT, ACAATA, TATTGT, AGAATA, TATTCT, ACAAAG, TTTTGT, AGAAAA, TTTTCT, ACAATC, GATTGT, AGAATC, GATTCT, ACAAAC, GTTTGT, AGAAAC, GTTTCT. **FOXO motif search:** TAAATA, TCAATA, TAAACA, TCAACA, AAAATA, ACAATA, AAAACA, ACAACA, GAAATA, GAAACA, TATTTA, TATTGA, TGTTTA, TGTTGA, TATTTT, TATTGT, TGTTTT, TGTTGT, TATTTT, TGTTTC, CAAATA, TATTTG, CAAACA, TGTTTG. **FOX:ETS motif search:** AACAGGAA, AACAGGAT, TACAGGAA, TACAGGAT, ATCCTGTT, TTCCTGTT, ATCCTGTA, TTCCTGTA. **RBPJ motifs search:** TTCCCA, CTCCCA, TTCTCA, CTCTCA, TTCACA, CTCACA, TGGGAA, TGGGAG, TGAGAA, TGAGAG, TGTGAA, TGTGAG. **MEF2 motif search:** CTAWWWWA, CTAWWWWG, TTAWWWWA, TTAWWWWG, GTAWWWWA, GTAWWWWG, TWWWWWTAG, CWWWWWTAG, TWWWWWTAA, CWWWWWTAA, TWWWWWTAC, CWWWWWTAC. W represents a T or an A. **SMAD4 motif search:** CAGAC, GTCTG, CAGCC, GGCTG, GAGAC, GTCTC, GAGCC, GGCTC, TAGAC, GTCTA, TAGCC, GGCTA. **SMAD1/5 G/C rich motif search:** CTGGAG, CTCAG, CAGGAG, CTCTG, CTGCAG, CTGCAG, CAGCAG, CTGCTG, CTGGCG, CGCCAG, CAGGCG, CGCCTG, CTGCCG, CGGCAG, CAGCCG, CGGCTG. **WNT-linked TCF/LEF motif search:** ATCAAAG, TTCAAAG, ATGAAAG, TTGAAAG, ATCAAAA, TTCAAAA, ATGAAAA, CTTTGT, CTTTGA, CTTTCA, CTTTCA, TTTTGT, TTTTGA, TTTTCA, TTTTCA. **NR2F2 motif search:** AGGTCA, TGACCT, AGGTGA, TAACCT, GGGTCA, TGACCC, GGGTGA, TAACCC. **KLF motif search:** ACACCC, CCACCC, ACGCCC, CCGCCC, GGGTGT, GGGTGG, GGGCGT, GGGCGG.
