# Supplementary material for: Evaluating the transcriptional regulators of arterial gene expression via a catalogue of characterized arterial enhancers
Source: eLife journal article supplement (doi:10.7554/elife.102440), 2025-01-17
Supplement: supp [file elife-102440-supp-v1.zip]

## Figure 6 – figure supplement 3

ETS SOXF FOX FOX:ETS RBP3 MEF2 SMAD4 SMAD1/5 TCF/LEF NR2F2 KLF

### Acvrl1+6 core

Conserved to opossum

TCATAGCTCATCTCTTGTCCCTCAGCCGTTTGCCCATCGCTCCAGCCTCCACCCCTGCCACCCGTCTCCCA GTGCCCCCACTCCACCCCCAGCCTGGCTGCTTCAAACATAAACAGGCTCTTGTCTTACTTCCTGCCATTCAGGGTCCCGCAGGCCGCAACAGGAATCAAATTGTTTAGATTGAGGCTGGATAGAACAGGCTGAAGTCACGCAAGCAGGAGCTCAGGGCAG

### Cxcl12+269 core

Conserved to opossum

>ATCACAGGCCATTGTGTGCTGGGCGGCTGCAGGGCGCTGCTCCACACAGGGCTGTGCCACATCCCCACCTTCCTTGAATTCAAGGAGTAAGAGTCA CACCAGCTCCTGATTCACTCCCCAGTTATTTCCAGCTTCGTTTTTTGGCTCCCCCTATAGCAGTGTCTTCTCAGGAGCAAACCTCTGGTGCAATGAACT ACAGAAAGTCCACATGCTGTACAGGGGTGTTATCAAGAAACAATTGTAGAAAAAGACTCTGCAACTTTGC

### Gja5-78

Conserved to chicken

>GGTCCAGGGTCCCCAAGTTCAATGGTCTTTTCTTTTGTGTGCTGTAGAAAGATTGCcgcctGAGCTACTTCCTTCCCTTCCCTTGGCATCTTTGCACTGTG CCCCAGAAACAATCATATCACATTCAGGAAGGCTGGGCAGCAATGGCAGGAAACAGGAATGTCCCCACGGATGTCTCCCCAGGGGAGACAGCCAG GGACTGGGA

### Gja5-7 core

Conserved to opossum

>AGGGCATTTGTGCTCTGGAGCTGGCCAGCTTCGCCCTGCCCTGGCCCCAGCACCCCAACTTGTAAAGAAGGAATTGCCAGGTTATCTAAAAGGAAGCCAA ATTGTTTTCGGAAACAATAGCCAAGTAGCTACAAGTCATTAGTTTCCTCCCAAGGGCCTAAATCAAGCTTGCTGATAACTGAAAGGGCTGTTAGCA CTGTTTACTTAAAGACCTCTGGACAGAACCATAAATTAATTCCTGTG

### Nrp1+78 core

Conserved to opossum

>GCGGCTCCTTCTCTTGTCTTGAAGCTTCCTGCAGACAACAGATCTCACAGGAAGTGCCAGTGTGGACGTTTCATATCCATGGCTAACGATGATTGTTGT TTTTTTTTTAAATGTTACTTGGTAATTTCTTACAGAAAACAATGGGAACCGAAGGCTGTTCCTGTCTTTAAGGAAAGCCAGTTTCCAATGTTGCTTTAT TAACTTAACACATGCAAGTATTGTTTCTAGTTGTTGCTACAGCAACGTGTTTGTGGGGCATATTTCATGCAAAATGGGATAAAGCTGAAAAACAAGAC AAATGTCATCT
