# Supplementary material for: Evaluating the transcriptional regulators of arterial gene expression via a catalogue of characterized arterial enhancers
Source: eLife journal article supplement (doi:10.7554/elife.102440), 2025-01-17
Supplement: supp [file elife-102440-supp-v1.zip]

## Figure 6 – figure supplement 6

ETS SOXF FOX FOX:ETS RBPJ MEF2 SMAD4 SMAD1/5 TCF/LEF NR2F2 KLF

### PAN-EC ENHANCERS IDENTIFIED IN OTHER PUBLICATIONS 2

#### Pdgfrb+18 core

Conserved to cow

```
>GGGGGAATTGGGCTAGATTGGGGGCAGCCAGCTCTGACAGCCCCGCTCCTCCGGTGACAGTTCCAATACCAGGCACTTATCTGCCAGGACA
AATATTGCGAAAGTGTGATGAAGGCCTGGAGGAGTAGAGGGGGAGAGCCAGAGCCTGAAGAGCTCCCAAGGCTCCCTCTACAAGCAACAAC
AGGAAATGGGATGCTCTGTGGGAAGGGAAGTGGGAGGGGGCGGGGTCAGGACTGTGGAATGTGGGAGTGGGCTGACCCCTACTCAGCACA
GAGCTGCAAAGGAGGCCCAGGAGAGAGGCCAGGTTCTTAGCCC
```

#### Tall-4 core

Conserved to cow

```
>TGTCTCCCTGGACCACGCCCTGAGGCTGGGGTTTGTGACGCTCTGCAAGCTCCCTGTTCCCTGTTTCCGACGGTGGAAATAAGGAACTGCGC
GCTAAGCTGGGCGCCCTGAAATAAGCTTCTGGTGCCTGTGGGTGACGCTTTGTCCAGACCCGCTGAGCCAGTGACGCGCGGCCAGGAA
TGCAGCCCTCCTCCACCCGCCGAGCCGGGCTCGGTGGGCAGGAAATTCGGAGCGCTCGGTGGGGGTGGTGAGGGGGGGAGGTTGAG
GAACCAGGAGGCTCTGGAGTCTGGCCCCGGGTA
```

#### Tiel-1 core

Conserved to cow

```
>GAGTGTTAGCCCTGTCCAGCTCAGTGCACCTCGGTGCTGGGGAGGAAGAGGAAATGATGGTAGGGTAGGAGGGGTGGCAGGGAGAGAAGCT
CGGAAAGAGTTGTGCGCTGTAGTCTCTCCCGTGTCCAGCCCCACAAGCCCGGATGGGTGTGGCCTGGAAGTCTCTGGAAGGGGGGCATTAGA
GGTGGGAGGCAGGTTGTGACAAGGACAGATCTGGGGATGGTTGGGCTCTCTCTCCCATCCCTTCGGTCCCTTCCCTCTGTCATTGCTGGAGCAC
GGGAGACAGGAAAGGGAGGAAGCCAGTGGCTTCCCTATTGAGAAAGGTTTGGAGGCAGGACATTGTCTGGGGTCTCCCTCTCCCAAGCAC
ACACACGCTG
```

### VEIN ENHANCERS IDENTIFIED IN OTHER PUBLICATIONS

#### CoupTFII-965 core

Conserved to zebrafish

```
>GAAGATCTGACAAGGCATCTCGATCAATTCCTGGTTTTGAGGCCGACCCCTCGGCCGTGCACACAGCCCCCTCTCTGAAGTGTATATTCT
GTCTTGAGGCCTTCTTTGGCCAGGATGTGCTTCATTTCCTCCCTTTTGTCTCGCGCTGAAATGTGAATGATGCTCTTCAGCAATATCCAGCCG
CTTAAACTCCCTGCTGTTGCCTTACATAAATATACAACAAGGCTCTCGGCCCTATAACTCACTTCAGGCCCTGGAATAATAAGTGAATTCCTTTAT
TGGTCCGATTCTCTGGCAAATCCCAACAGCTGTATGTTTGCACCTCAGAGGATCCATATCTTCAGCTTTCCTTTTGTCTCAGC
```

#### Ephb4-2 core

Conserved to manatee

```
>CACTTCCCCGCAGCCTGACCTCCAAGGCGGGGTAGGGACCGTTGTGGCTCTTTCCTGAGGCTGTTTCCTGCTGGCTCCTGGG
GGCCCTCGGGATGGCTGGAGGGCCCTTCCTCTCAATTGCTAGCACCCCCTCTCAATCATGTTGAGGGGAGGGTCCAGGAAAGACGGCCT
CCTATCTACATCAGGGCACCTGTGATGTGGGGCACGGGATGGTTGATGAGAGAGGTGCTGTTCCCGAAGTCGGTCTTTAAGGGCTGCGGTA
AGGAGACTTTAATTTAAGGTAATTAGTACAGGGTCTGGAACTCTGAGGTAGGAGTCTGGGGCACCCTGGGAGTCTGCCAAATACCCTAAGGGC
GCACACACACACCCAGCGGGCGCGGGAGACCGGTGATGACCTCTGTCTCGCCTGCGCGCACACACACACCAGCGGGCGCGGGAGACCCGTGA
TGGCCTTTTGTCTCCCGTGCATTATCTTCCTGGCGCAAGTAGTGTCTCCACCCCTGCTGCTTCCTCAAGCCCTGCCTGGGTCCCGCTCCCG
GGTGGGGGTGAGCCAGGGCAGGAACAGCCGGCTTGGCTGGAGCCAGGCTGACCGCTAGATCTGGGATCCCCCTCTCTCTCCACGCA
ACTCAGGCTCCCCCTCTCTTAT
```

#### Mef2cF10 core

Conserved to chicken

```
>TATCTGGAAAGTCCAAGGCAATGTTTACTAGTCAACATGGTCAAAATATACCTAAGTTAAAGGTCAAGGAATCTACATTCCTTGCTGAGCTA
ACTCAGGAAGCACATTTGTCTACGCTTTCCTGTCTATAACAGGAAGAGAGTAAGTTCTTCCTTCCCAAGTGGCTTCAGTTTGTAGCTCCCACT
CCAATATTTTCTCCCTCAGGGCCTTCCAATCAATCCTTGCAAGACAGAAGCAGGAGGCTGCCTCAGCTGTAGTTTCAACAAGTTACATTT
GTTGAATCTTATTATAAT
```
