# Supplementary material for: Evaluating the transcriptional regulators of arterial gene expression via a catalogue of characterized arterial enhancers
Source: eLife journal article supplement (doi:10.7554/elife.102440), 2025-01-17
Supplement: supp [file elife-102440-supp-v1.zip]

## Figure 6 – figure supplement 4

ETS SOXF FOX FOX:ETS RBPJ MEF2 SMAD4 SMAD1/5 TCF/LEF NR2F2 KLF

### ARTERIAL ENHANCERS FROM PREVIOUS PUBLICATIONS

#### D114-12 core

Conserved to opossum

>ATTGCCTTCTGGGGGGCATTGTGTCTCCCCGGCCCCCTCCCCAGGCTCAATGAGCTGTTTGTGGCATGTCCGGTGAGGGTAAGTGAGGGCG  
GGCATGGGGCGACCATACACAATGGGGATTCCGTCATTCTGAGGTGACTGCGGAACCAGGCCGCCTTTGTCTGGGGACCCTTATTCCCA  
CATTTAGAGCCGGAACCTCAGGCGGAAGGCCCTGTAGTATAAGAACACAATGTCGTACCCCTGTCTGTAGGGGAG

#### D114in3 core

Conserved to chicken

>TAGACGTAGGTAATGGTTTTCCTTTTCCTTTTCAAAGTGAGAAATGTTGTGCTGGTGAAATACTCTTTTCCTCTGTGTGAGAACAAATCC  
CAAAGCCATTATTCCCCTTTCCAAAGGAGCGGAATTTCGCAAAAGGTGTAAATACAGGAAGAGGCCCGTCAGCGGCGCTGGCAGCCTCGGCCTT  
TCTCACCGCGGTGCTCCCCGCGTTCCCAAGCCCAAAAATAACCCGCAAGGAAACGCAATTGTGCTCTGAGTCCAGG

#### Ecelin1 core

Conserved mouse-human only

>GAGCCACCAGTGAGTGAGACCTGGGTCTCAGGGGATGGTCAGGGAAGACAAGAGGCGAAATAATATCTCCATTTCATGCAGGTCCTCTAGG  
GGGAAAAATGTGCCAGGCCCCGTGAATCTGGCTAAACAGGAAGAGAAAGCACAATGAGGGGAAACGGAGGGTGTGGCAGGCCCTTGGGGGAC  
GGGACCAGAGGGGACAGGCTTGTAAGCTCAGGACCCAGGTCTGGCTTTACACCCAAAGCCAGCACGGAGAT

#### Flklin10 core

Conserved to chicken

>GGAGGGAAGCAGCTATTCTGGGAAACAAGTCTCCATTTCATAAATTGGATCGACAAGACAATTCAAGCTCACTTAGTTCAAAGGAAGGTAAGGA  
AACTTGGAAAGCCATTGGGGCTTCTTAAAGTCACCTCTCTGGGACGGACCGACTGCGGGCTTTTGTGTTAGGAAATGGCCAGCAGCAGAGGAAG  
AAATCGGGTTTGTCTATTTCAAAACAACAACAGGAAGTGAATGCTTGGGGTGGTAGGTGAAGGTGGTGGCTGTGTTTTCCCTAAGGATG  
TCTGCACTTGTGGTAGACCTTGATAAGCCTGGGCCTGAGACTCTCGAGGCTGGGGCTAGGTTTATCACTGCCTCGCATCCACGACACTTCCT  
CTGAGAGATGGACATTCCCAAGATAAGGAGGAGCAGTGTGGTCTC

#### Hey1-18 core

Conserved to chicken

>AGGGGAGGTGGAAGTGTGGCGCGGCCGGGGTTCCCAAGCTCCATTATTGTGGCGCACTTTGTTTCCAATTCCCATACGCTGTGCTAATTAGTTG  
GAGCTGCTGGCTGCTGGAAAGCGGTGTGGCTTGCCTGAAAGCAAGAAATCGCTTCCTGTTGGGAGTCTGGGCAGGCAGGACTCTAGCTCAGAA  
G

#### Notch1+16 core

Conserved to opossum

>TGCAGGGCTGGCCAGGATTGAAGCCAGTGTCCAGCTTTCCCAAGCTCAAAGAACCATTCCCAAGCAGCTCAGCTCTTTTGTCTTCAATCTTTT  
CCCACAGTTGCATCCTTGGGTGGTTTAAAAATACGCTGAAAAAGGAAGCTCAGGAAAGAGCGCAGGCTTCCTGGCCTGGCTCAGGGAAGCCCTTT  
GTCTGGGAGACAGTTGAAGTTGGAACCTGCCCTCTAGGGAAGCCACCTTTTCCCACTATAGGGAAAACAATACTCCCCTCCAGG

#### Sema6d-55 core

Conserved to cow

>TGCACTTCCTACACAGTTCCCATTTCTGAAGAGATGCCATCAAGCCTAGAGGACTTGCTCCATTGAGAGCATTTTGTACGCTGCATCCCTCC  
CGATTCTTTTAAACAAGAAATGAAGGACAAGCCAACTGAGCACAAGGTTATCCCTTCAATGCCACAGGGATCTCTCAAGTCAGGCTGTCTCTAA  
ATATAATACCCCAATGGATTACTTCCCAAGAGGCTTTTCATAGGATGCTGGCCTCATCATGGCACAAGACTTGTCTGGGCCCACTTCCTGAAG  
CAGGAAGGCCGTTCTATTTTGTGTTCTCTCACAAGCAGCAAGGAAGCAAACAATGCTGGAGCAGGAAGCTGAACAGGAATTTGTTGACAAA  
AGCAATTTTGTAGATTTAAGGAAGAGGTGCTTGTAAATTTTCCTCTAACAGCTGGCTGA

#### Sox7+14 core

Conserved to opossum

>ACTCAGGCGGACAGAGAGGAAGGCACAGAGCTCTGCTAATCTGGAGAGAGATTTTCCTCTAGGAGGCCCTTCCTTGGGCAGGGCTCTTTT  
GGTGGCGGCCAGGTTGGCTGGCCTGAAGGTGGTGGCCAGGCTCTATAGGAGAGGCTGCCTTATCAGACAGGAAACACTGGGCTCTGGTCACT  
TCTTCCCTCTCTGTTCAAGCAGCTCTCAAGGCAGGAAGAGCTCGGCAGCTACTACTCA
