# Supplementary material for: Evaluating the transcriptional regulators of arterial gene expression via a catalogue of characterized arterial enhancers
Source: eLife journal article supplement (doi:10.7554/elife.102440), 2025-01-17
Supplement: supp [file elife-102440-supp-v1.zip]

ETS SOXF FOX FOX:ETS RBPJ MEF2 SMAD4 SMAD1/5 TCF/LEF NR2F2 KLF

Apln+28 core

>CTTTTGCTTTTGCAGCTGCGGTGGAAGTGAGGAAAGCGGGAGGGCATCCTGAGGCGGGAAATGCCTATCGGTGTATCCACAGCTG **CTTCCG**  
**CTTCCG** CCTTCAAGGATTCT **CAGCC** TCTCTGTATCCCTGCCAACCCCTCTCCCTCCCTGAGTTCTGGC **CAGCAG** CTGTGCATTCCCCCTT  
TAGGGCCAC **TTTCA** GATCCTC **TGAGA** **GGCTGT** CAGTTCC **CATTGT** TCTCGGGCTTCTCCGGCATTCCTTA **GGCTC** ATAGGGGAAATGC  
CAGAGGCTTGCCCCCACCTCCTCAGAGATGCTTGGCTACTAGTCACC

>AGGGCCGAG **CTTTGT** GGAGAGCACAGTTGATTGCCTCAGGAGGGGAGAGGG **GAGCCACACCC** AGGCTG **GGAG** GGAGGCAGGT **TTTCCA** ACTG  
GCCCTGGCCCACTTCCCTCGGGATG **TTTCTGTTATTGT** TC **CTTTGTGAG** CT **GCCTGC** CAGATAGGCAAGCCCTACGGT **GGGCGG** CCTCAGC  
TTGGT **CAGCC** TGGGCCCG **TGGAAG** CCTTGACCTGCCTGGGGTATTC

>TAAGCTGTCTACTCTTGT TATTTT TAAATATCCTTTAAAGCTTGGGGTGGGGGAACAAGCATCTGTGG CCGCCGAGAAATCTCTGTTTCC  
TCTGGGCC AGGAAACAGGAAGTGTGTGTGTGGTGGTGATGGGAATCAGGCCCTGAGACAAATGGAACACCATTGAGAGGAAGGGGAACT  
ACGTCAGGGCCTGGGGCTGCAGGAAGCCTG

>CACAGGC **TTGAGAG**ATGCAAAAGGGAAGAG **AGAAACA**AGCAGGCCCCAGTCTCT **CCGCC**TGGCAGACATGAGC **AGGAAAGGCTGGTGGGGCTG**  
GG**ACAAAG**GGCGGACGTGCAGAGGGCCATGTGTGCCCTTATCAGGGCCTGCACTTGCTCCCCCTGGCCCAAG**AGGAAATGCTGCTCTACTTTGC**  
CCGC**CTTCTCT**

GGAAAGCCTGTGTTTCAAGTCTGCACATGTTCAGAAGGGCTCCTGGCCCCCAGCCCTCAAACACCCCCACCGTGGAAGCCGCCAGGCTTTCCT  
GTTTACTCGAGGCCCTCTCGGGTCTGGGAGGCGACAGCCTTGCCCTCCTCTGCTCCCACTTCCTTCTCTCCCACTTCAGTGCCCTCGGCC  
CAGGCACTCAGGGGGCCCTGAGGCCAAGGCAT

>GCTAAGTTAT**FGTTTGCCTCCCA**ACGATCC**TGAGAG**CTATGGTTTT**CTTTGT**TCTACCAAAGGGAAA**AGGAAA**CATAT**CAGGAAG**CTGGGCCAG  
TCCAC**AGGAAGTCTC**TA**CTTGGGCT**GATAAAAGGAACTGATGTGCAGTGGCTTGGGATGCAGTTATAAGTCAATCTGCCTTGAAATTACAAGAA  
ATGCTGTT**CAGGAGAAAC**TGTAGCCTGAAGT**CAGCC**TTGCTCGGGTC**TTTCCT**TTACCT

Conserved to chicken  
>GGGATTGCACCTTGGCCCCAGTCCCAGTTAAAGCTTCAACAGCTCTGTCTATAACAGGAAGAAATGGGCAGATGGTCACAAACAACAACAGCTC  
TGCAATTCACGGCACCAAGGGTGGAGTTCCTCTGTTTCTCGCGTTGCCAACTTCAAGGTCTTACAAAGGATACGGGACATTGAAACCCGATGAA  
CCTCCATCTGATGATCTCAGGCCCCATGCACATTTCTCTTAAGCATAGGATGCACAGATCTGACTAAATTCGTGATTAAAGAACTCCCTGG  
AGACATCTCTTACAGCTCGTCTCCATACCCCTGAAAGGACGGGAGCCACTTGACCCCGTCCCATGTGTCTTTTATCATGCTGTGTACAGACA  
CTTCTCTTGGTATCTGAGCTGAGCAAGCTGAGGCATGGGCTCTTAAGAGACAGACATTT

>AGCGGGTGAACGATTTTAAACTCATAAATCACTTCGCCCTGAAA**AAAAATATATTAT****TATTCT**TAGCATTTTACACAT**TATTTG**CAGAGTGAGG  
 GGTATTAGAAAT**TTCAAAA****CAGCC**CAGCAAGAGGCAGGACTGAGTCGAGGT**GGCT**CTGAAAAC**T**TCGGGT**CGGAA**CAGATACCGAAG**TT**  
**TCCT**TATCTACC**GGCT**CGAGATGTCCGGAT**AGGAAA****TCCGGCAGGAGAT**CCGAAAGGACA**TTTTTTTAA**AAAAATCACTCAAATG**AAAA**ACA  
 CAGTATAGGTGACTCCA**TGGAAAAA**TATAAA

conserved to species

>CCCTCCTTCCCTTCAGCAAAATCCCTCCTAGTAACAGAAAGAAATGTTGACAGAAATGGCAGGAAACACGCAACAGACTGGCCAGGGAAGGATATGATGTACAGCAACCGCGAAACAATAAAAGGTGTAAAGGTGCTTCCCTCCCTAAACTGCTCCACAAGTGTAAAAATGGGAACAAAACCTCTCCACTTCTCTGAGTAGAGCAGGCTGAGTGTCTCGGCAGCAC

conserved to confer

>ATCCCAGTTAGCTTTCTCTGTTTATGCCATGGTTGGCTCAGGAGCTAAGCAAGGAACCTTATCTTCCTTGTCTCCACCATGTCCCAGC  
CCACTGGTGAGACTCTCCAGGCGCTCTCTCTATCGGTTTCCACGGTGACCTGGGCAGACAGGAACCTTGACAGAGTTTCCGACAATTGTGC  
AAAGGGAAGCAGGAAGCTGGTCAGCGCGGCTTGACTCCTCCC
