# Supplementary figures and images for: Evaluating the transcriptional regulators of arterial gene expression via a catalogue of characterized arterial enhancers
Source: eLife journal article supplement (doi:10.7554/elife.102440), 2025-01-17

Figure 1 - figure supplement 2

A

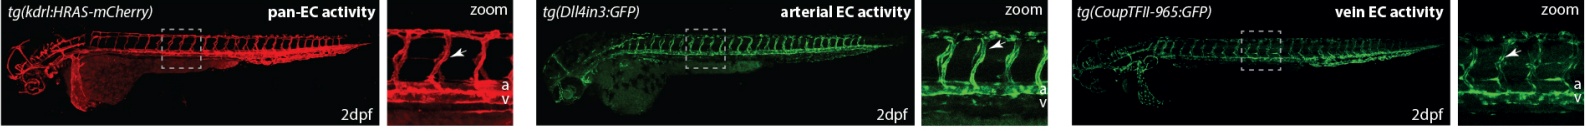

B

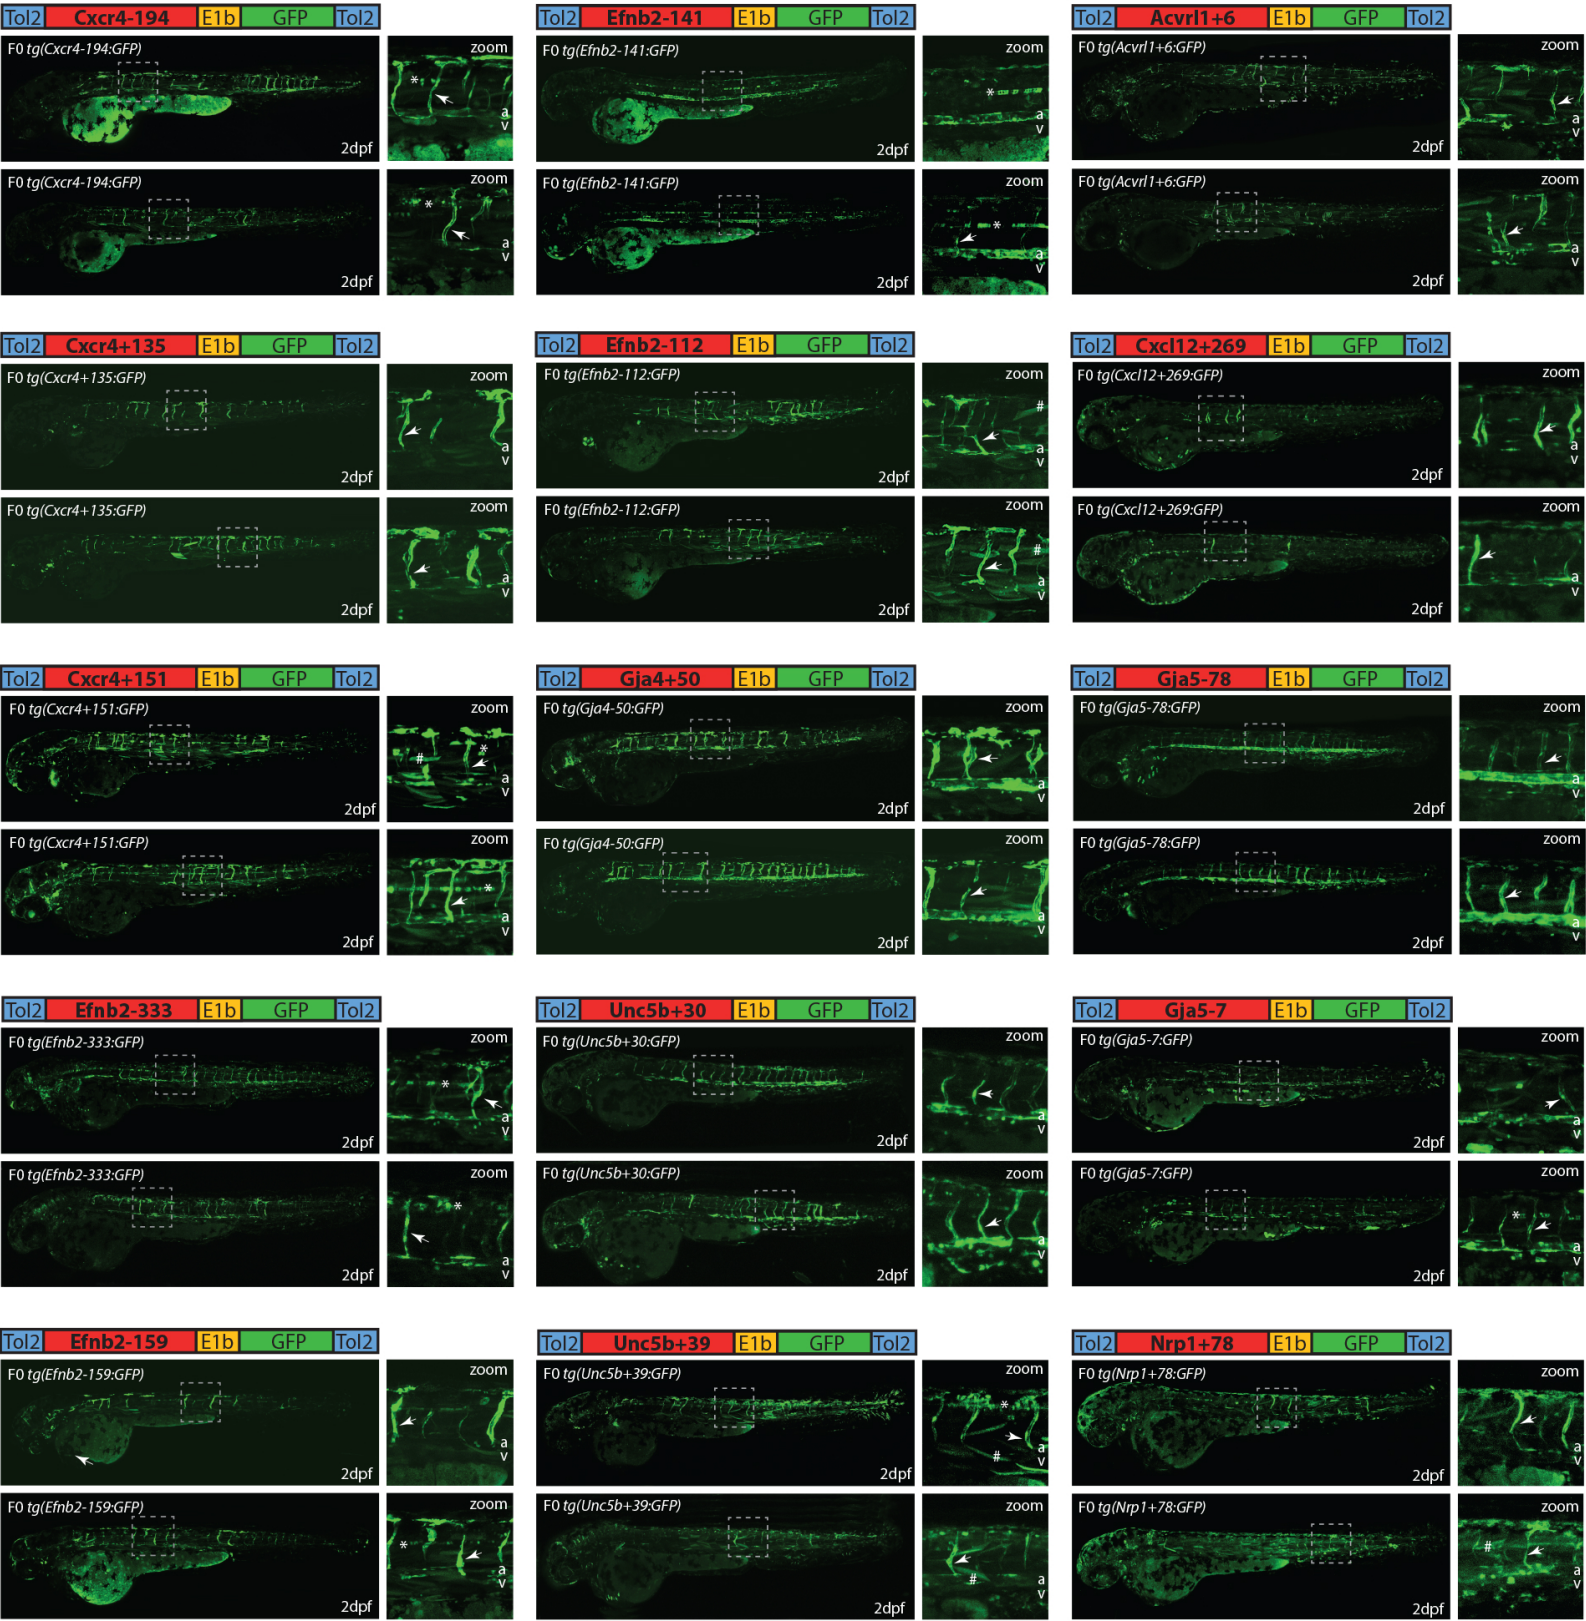

Supplement: supp [file elife-102440-supp-v1.zip]

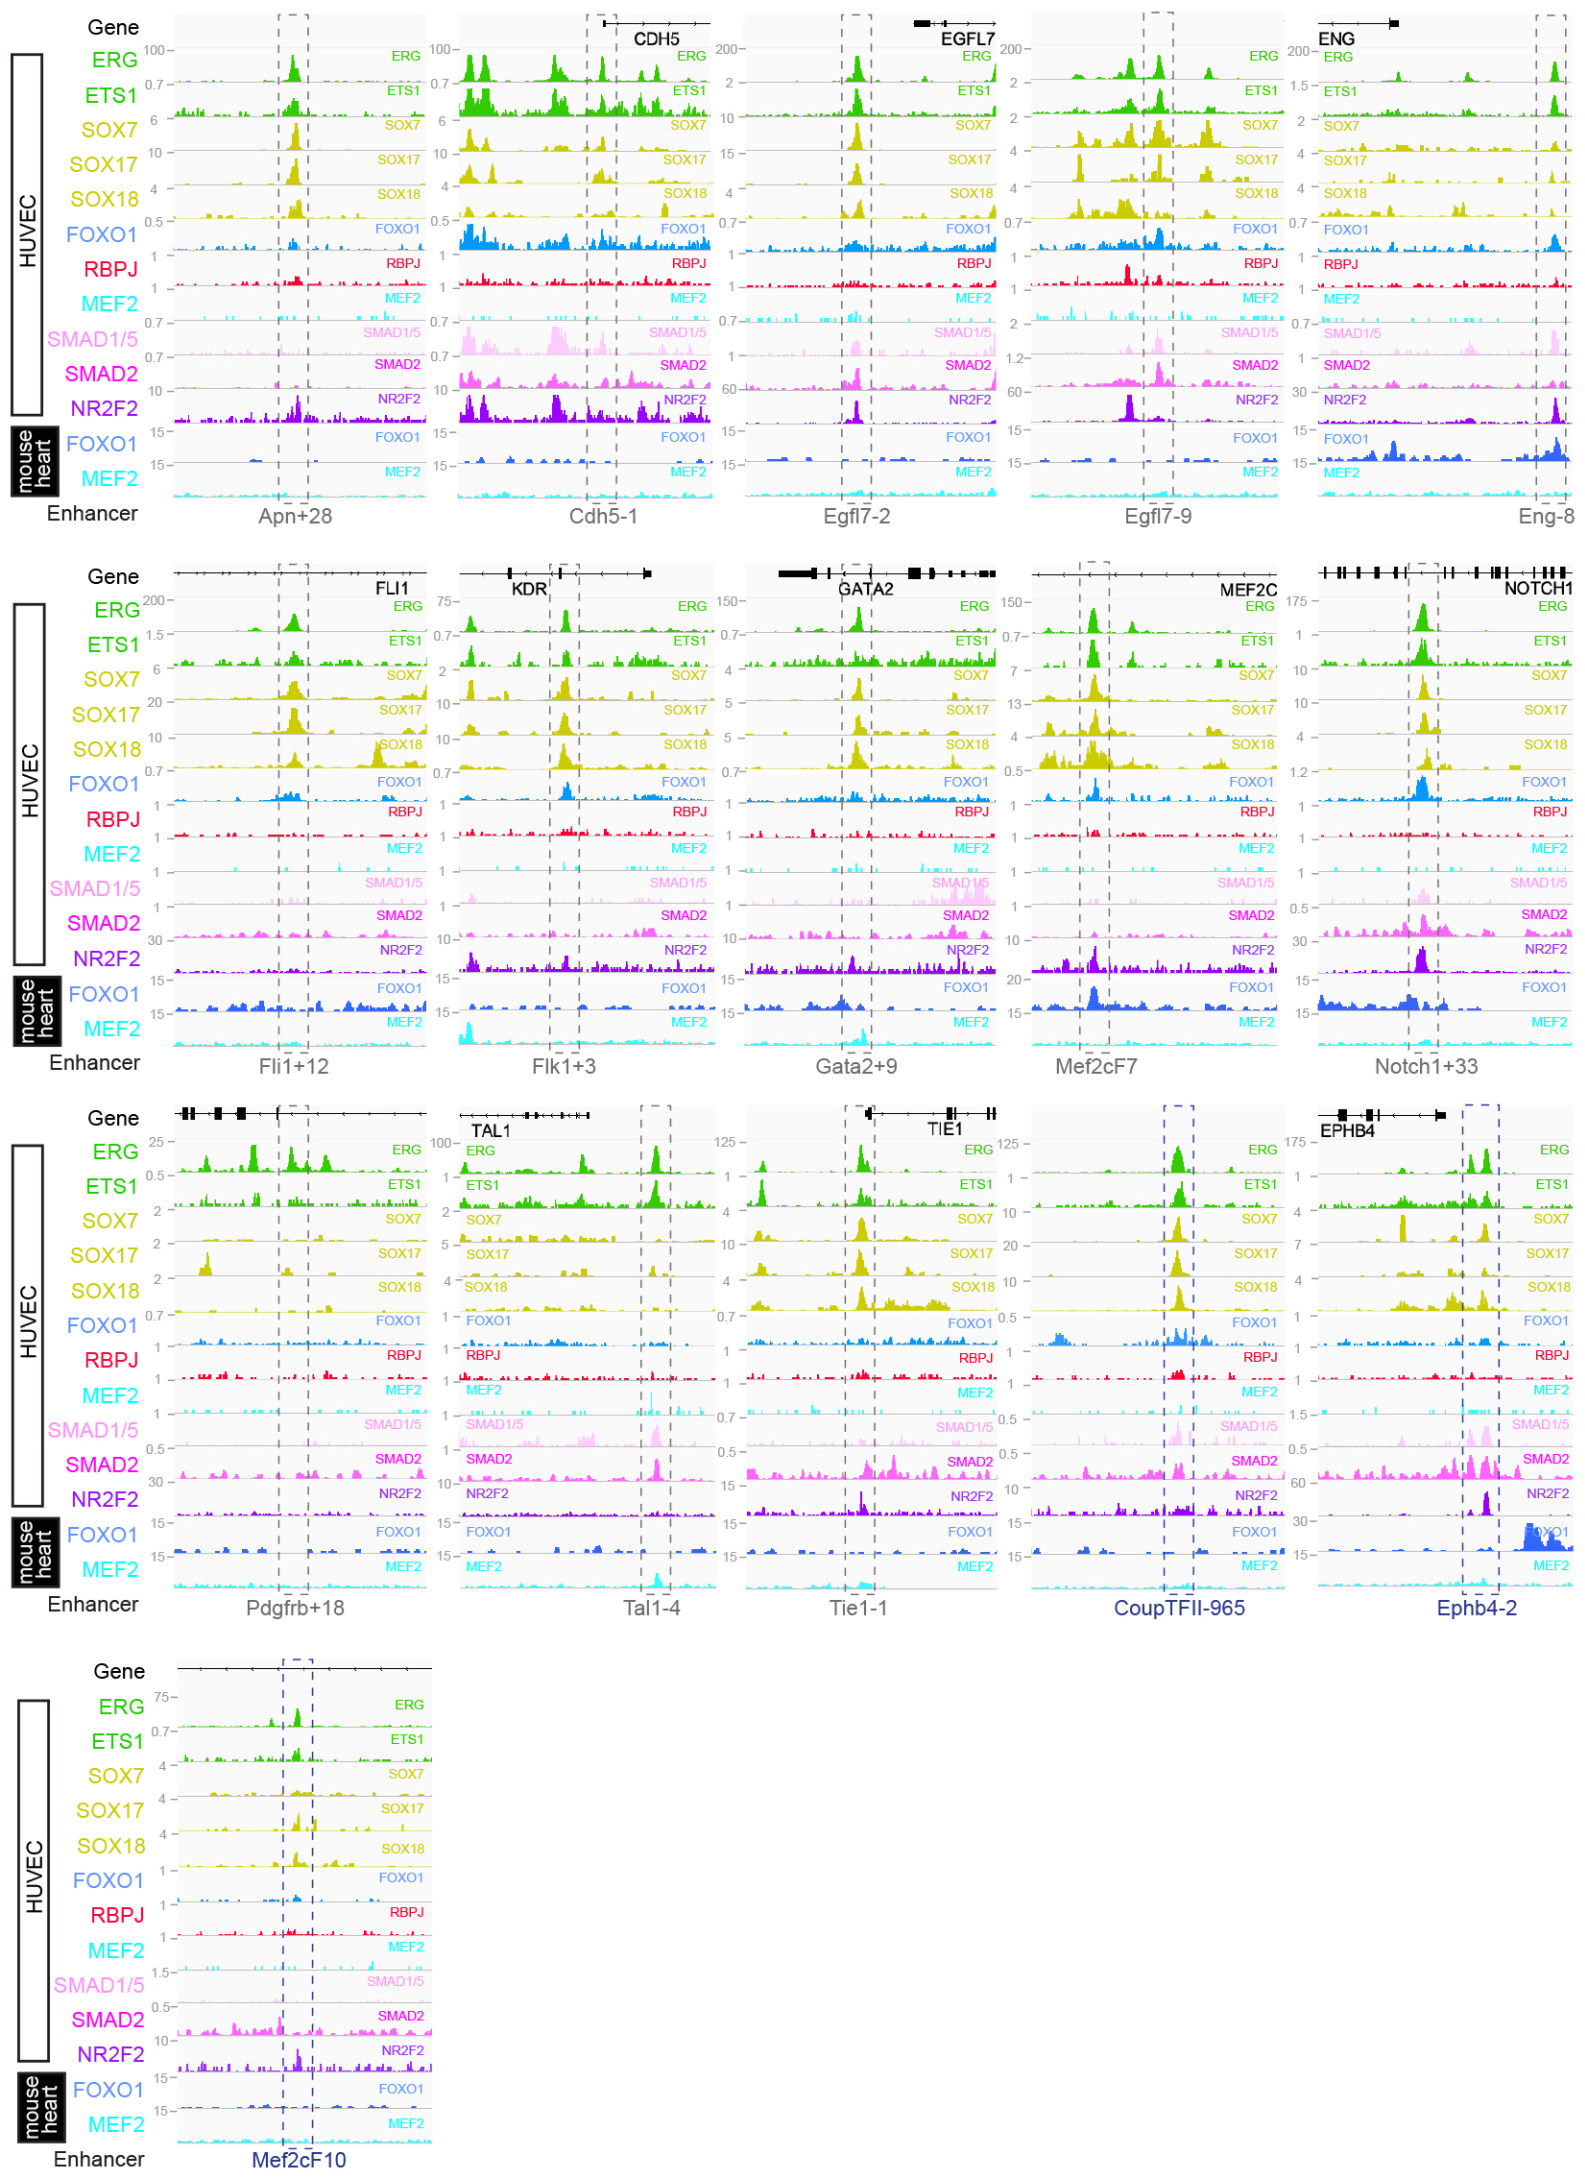

Supplement: supp [file elife-102440-supp-v1.zip]

Figure 7 – figure supplement 3

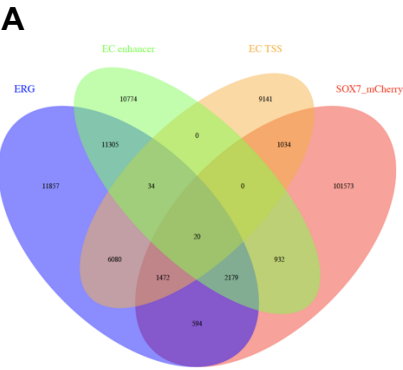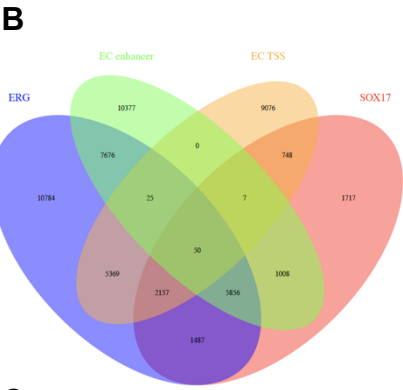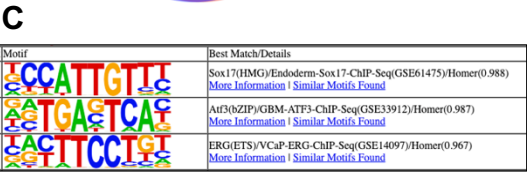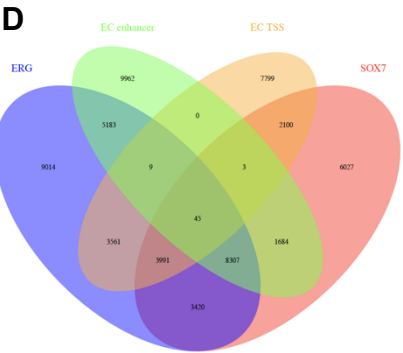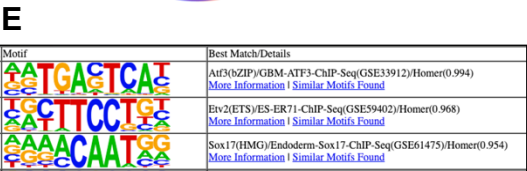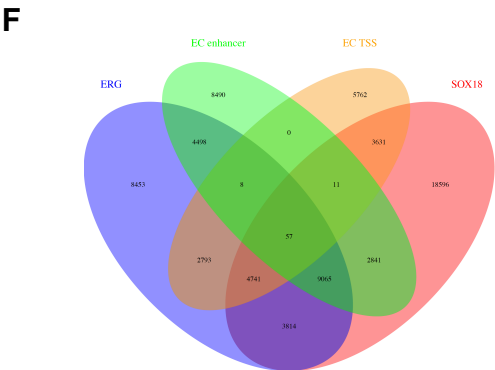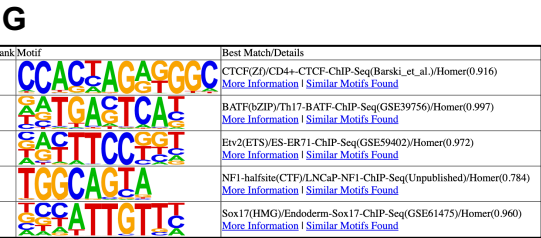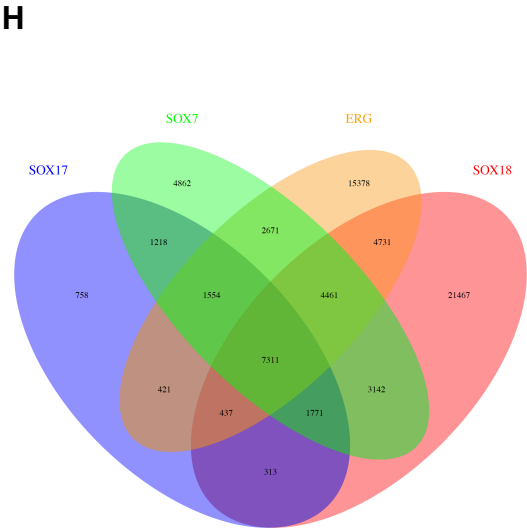

Supplement: supp [file elife-102440-supp-v1.zip]

### Figure 1 - figure supplement 1

**A**

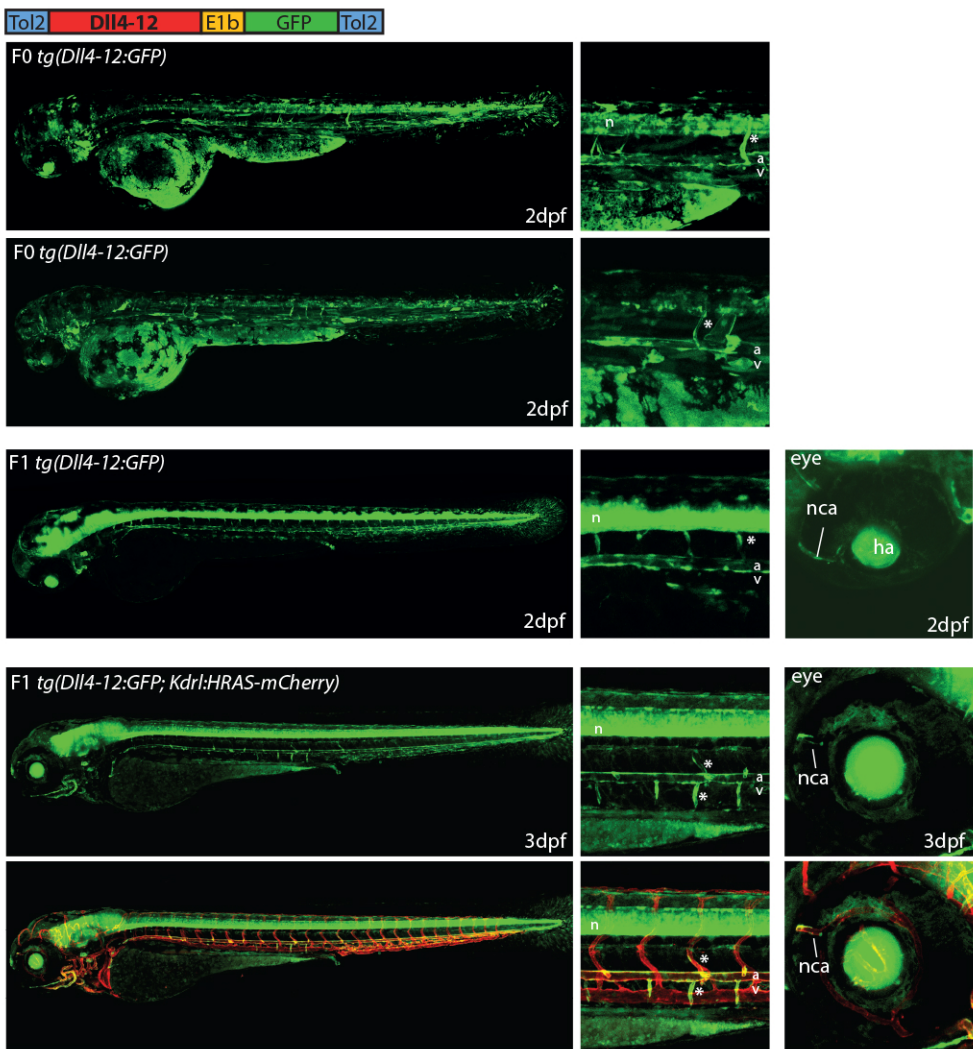**B**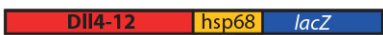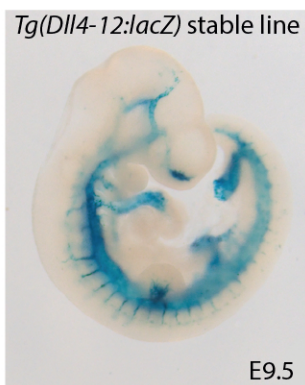

*Tg(Dll4-12:lacZ)* stable line

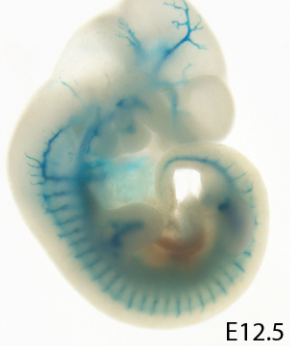

*Tg(Dll4-12:lacZ)* stable line

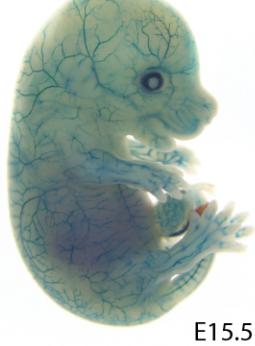

E15.5

Supplement: supp [file elife-102440-supp-v1.zip]

Figure 5 - figure supplement 1

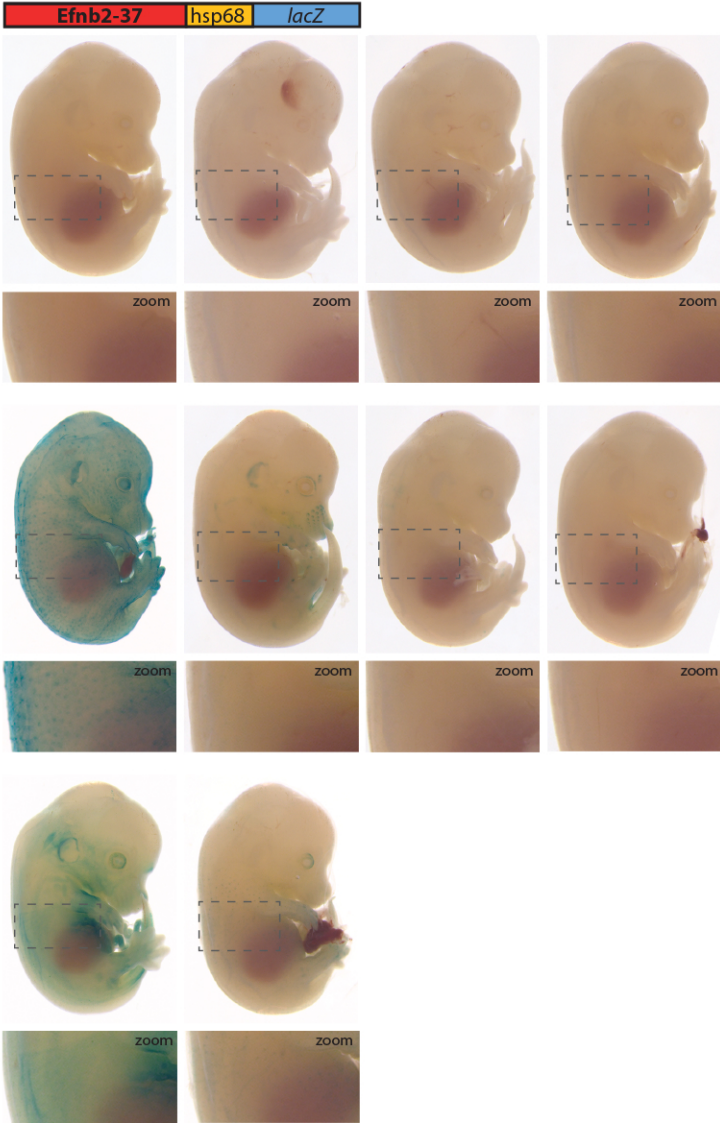

Supplement: supp [file elife-102440-supp-v1.zip]

**Figure 1 – figures supplement 4**

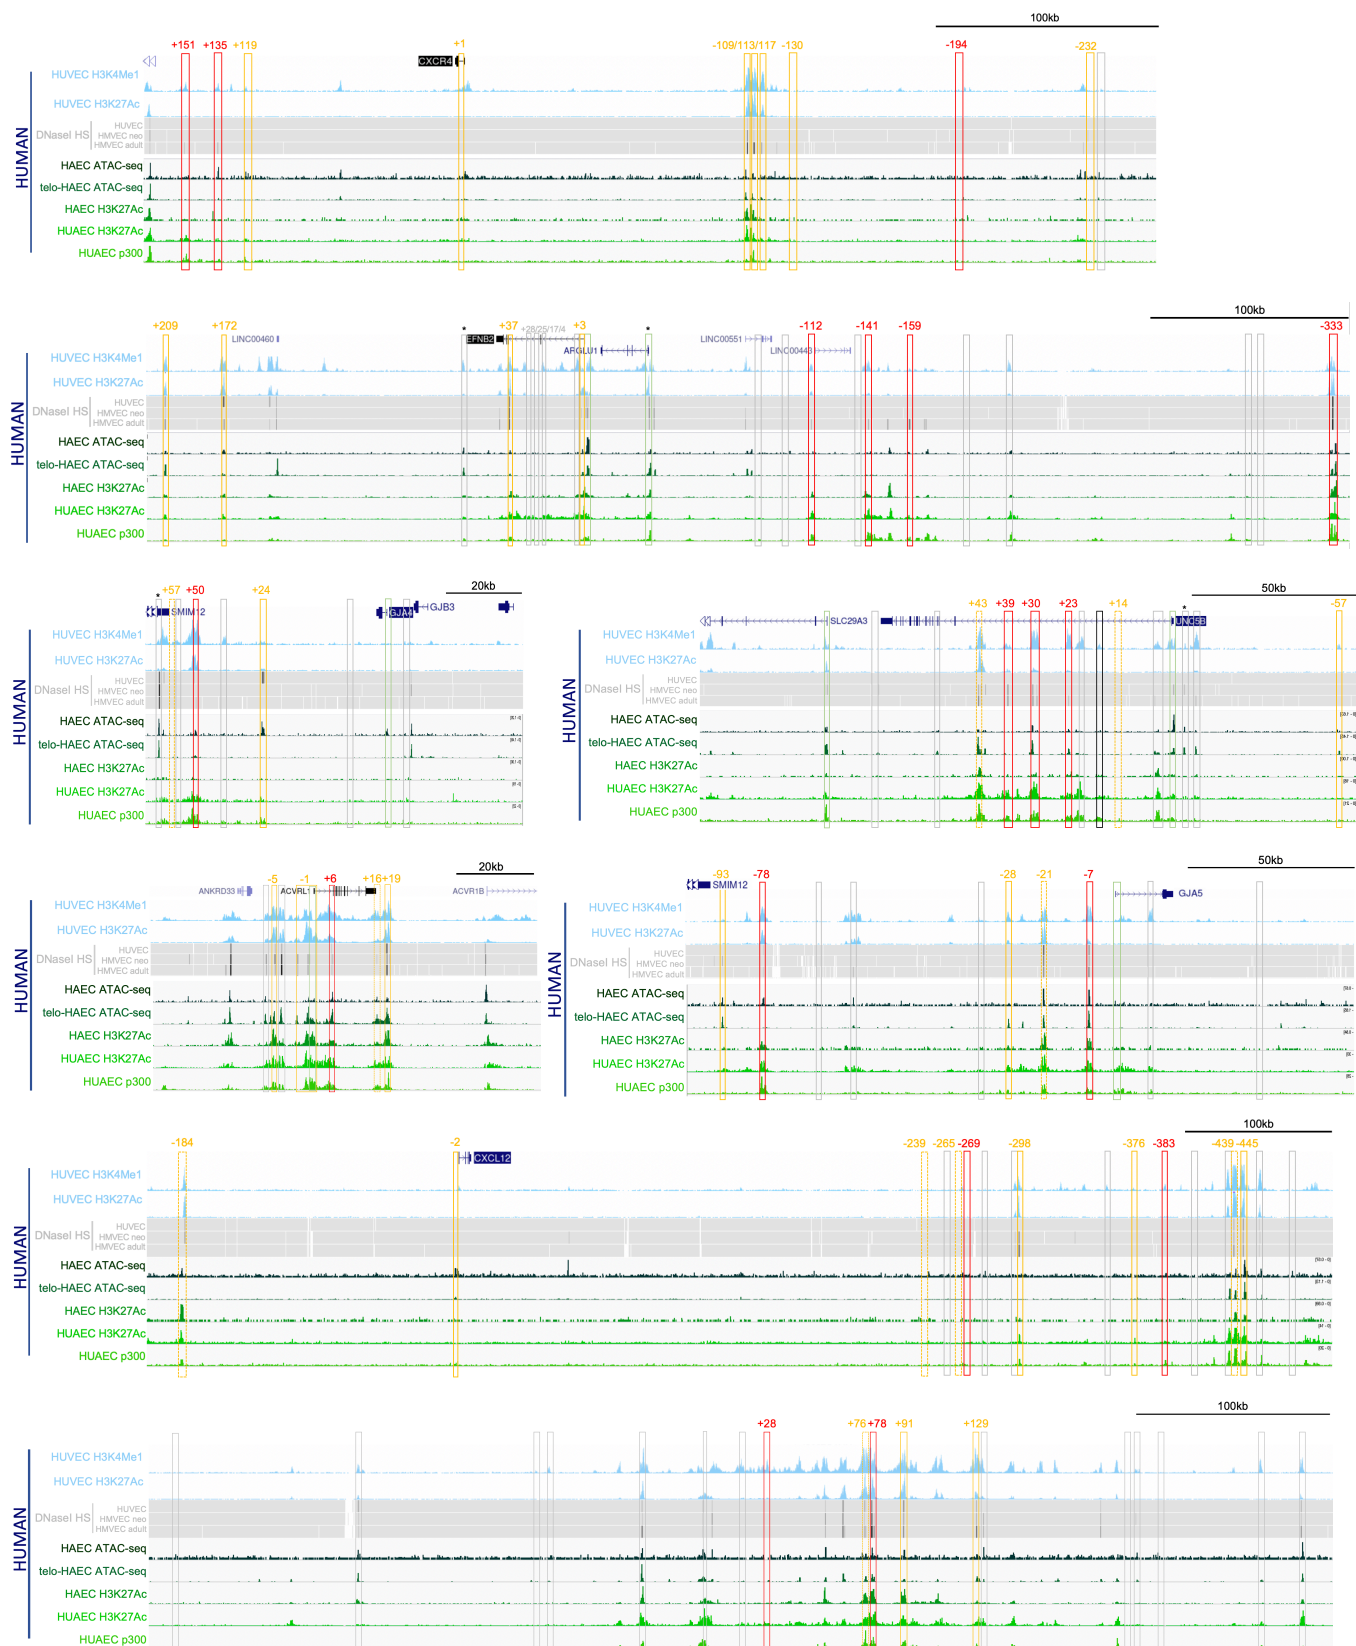

Supplement: supp [file elife-102440-supp-v1.zip]

Figure 7 – figure supplement 4

A

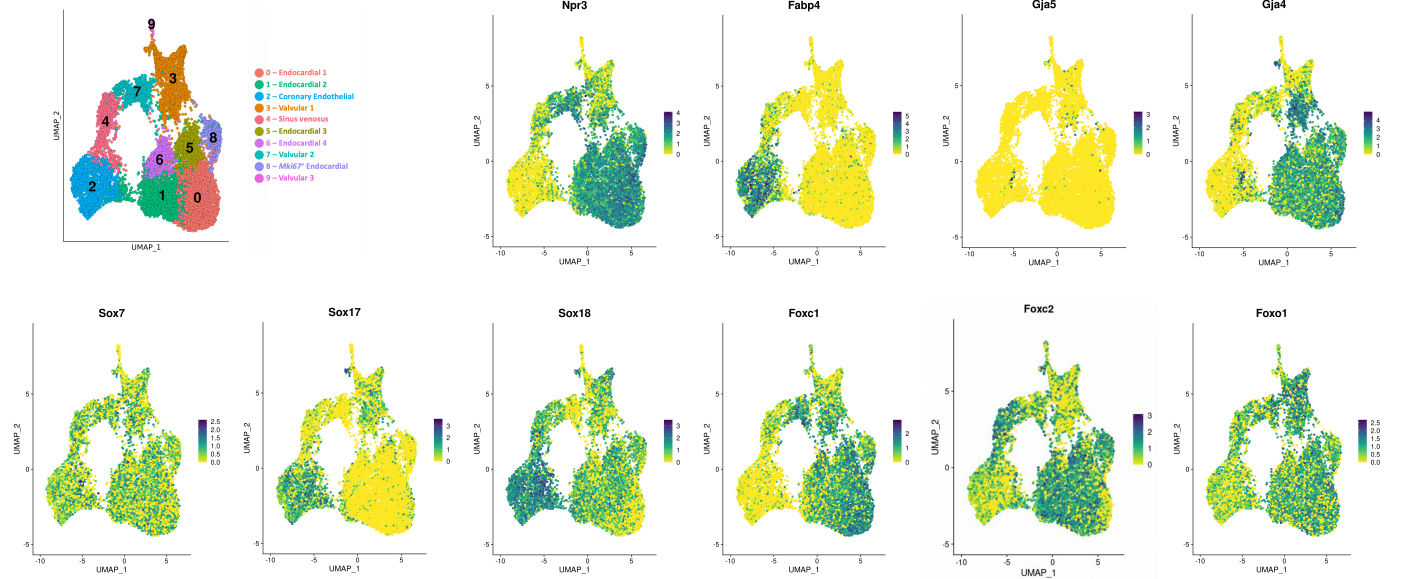

B

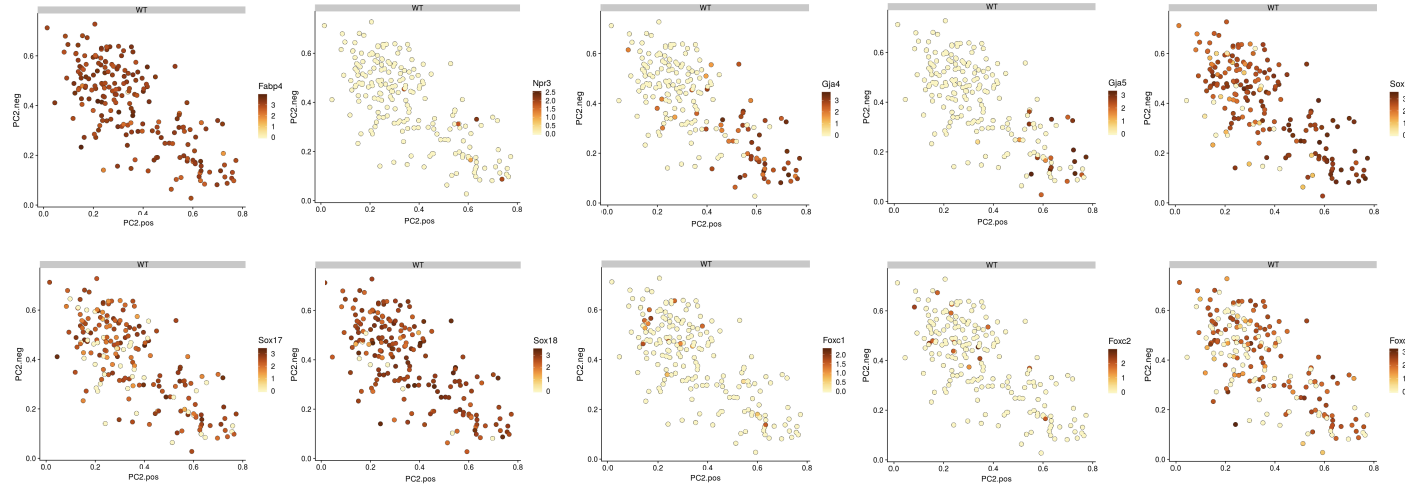

C

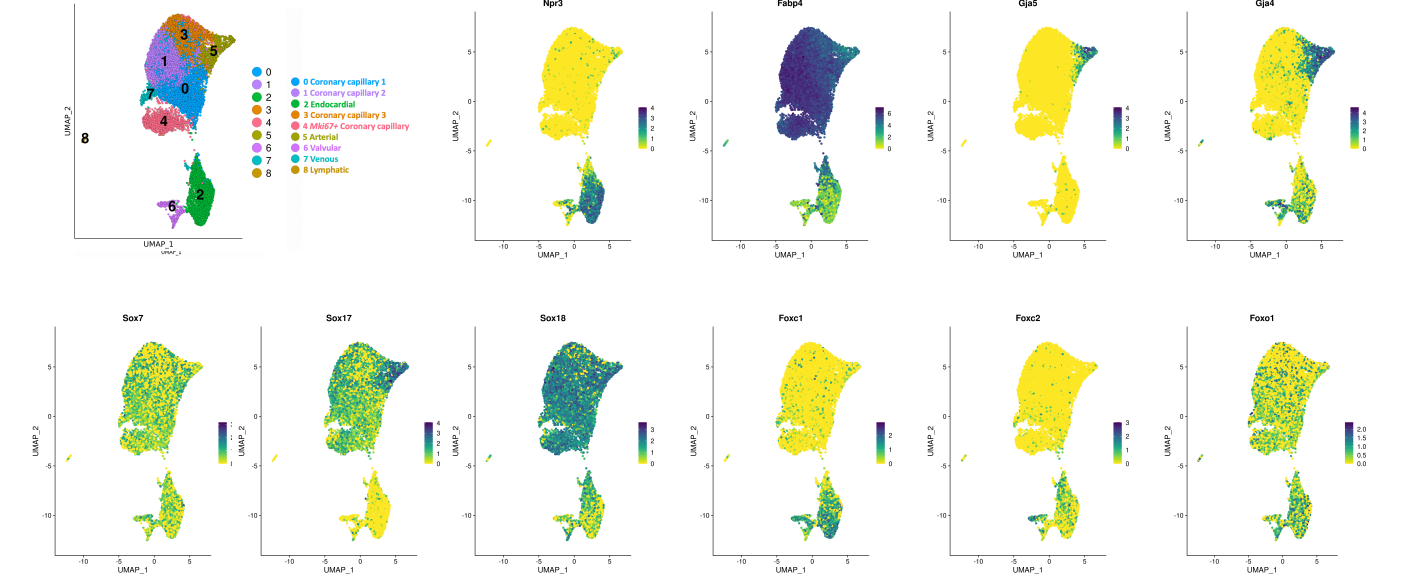

Supplement: supp [file elife-102440-supp-v1.zip]

Figure 1 - figure supplement 3

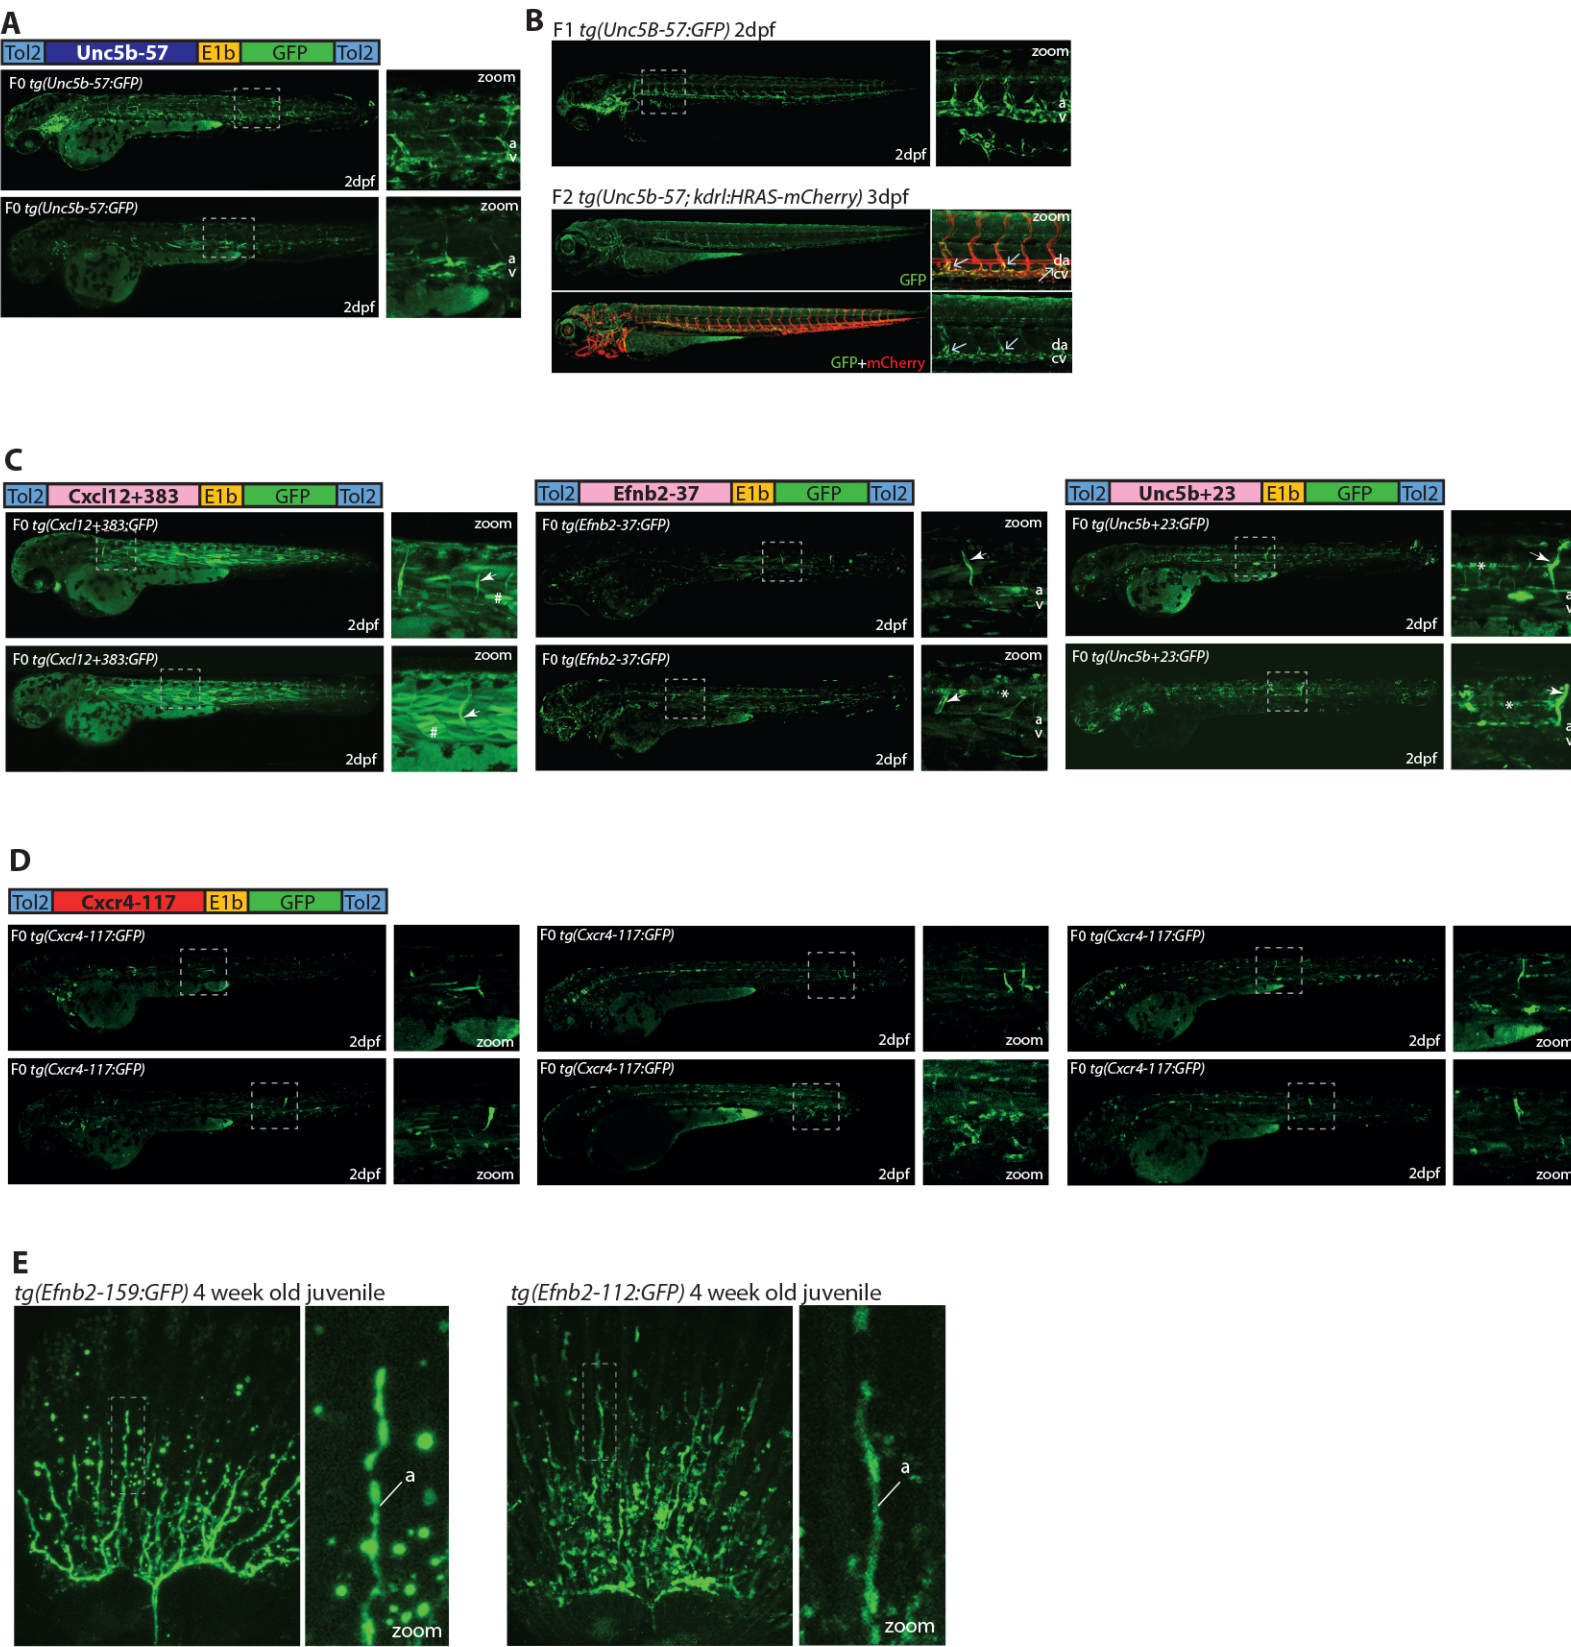

Supplement: supp [file elife-102440-supp-v1.zip]
